# Supplementary material
Source: PubMed Central journal article supplement (PMC7486704)
Supplement: pnas.2006659117.sapp.pdf [file pnas.2006659117.sapp.pdf]

# PNAS

[www.pnas.org](http://www.pnas.org)

Supplementary Information for

Genome-wide analyses reveal drivers of penguin diversification

Juliana A. Vianna, Flávia A. N. Fernandes, Maria José Frugone, Henrique V. Figueiró, Luis R. Pertierra, Daly Noll, Ke Bi, Cynthia Y. Wang-Claypool, Andrew Lowther, Patricia Parker, Celine Le Bohec, Francesco Bonadonna, Barbara Wienecke, Pierre Pistorius, Antje Steinfurth, Christopher BurrIDGE, Gisele P. M. Dantas, Elie Poulin, W. Brian Simison, Jim Henderson, Eduardo Eizirik, Mariana F. Nery, Rauri C. K. Bowie

Juliana A. Vianna  
Email: [jvianna@uc.cl](mailto:jvianna@uc.cl)  
Rauri C. K. Bowie  
Email: [bowie@berkeley.edu](mailto:bowie@berkeley.edu)

**This PDF file includes:**

Supplementary text  
Figures S1 to S16  
Tables S1 to S13  
SI References 124

## Supplementary Information Text

### Materials and Methods

#### Sampling

The genomes of 18 extant penguin species (22 individuals) were sequenced. We sequenced the genome of macaroni penguins from two populations and gentoo penguins from geographic locations corresponding to four divergent lineages previously identified (1-3; Table S1, S2). We sequenced the genome of a giant petrel from Antarctica as an outgroup for the analyses reported below. Blood samples were collected in the wild through our fieldwork for most penguin species, with the exception of erect-crested (AMNH 211990) and fiordland (AMNH 17808) penguins where tissues were provided from museums. A blood sample from an African penguin was kindly sampled for us by the California Academy of Sciences aquarium, and DNA was isolated from a preserved museum round-skin specimen of the yellow-eyed penguin (MVZ 149367).

Animal handling and sample collection were approved by the Ethics and Welfare Committee of Pontificia Universidad Católica de Chile to conduct this research. Samples from all penguins were collected under permit: Subsecretaría de pesca y acuicultura, Chile, permits 2086-2014, 110-2012; Pontificia Universidad Católica de Chile INACH 44/2012, 45/2016, 46/2016; Terres Australes et Antarctiques Francaises, 2012-126, 2012-111 and 2012-117, 2007-145; Convenio de cooperación internacional Fundación Charles Darwin, Parque Nacional Galápagos, Missouri U and Sant Louis Zoo; DEC Western Australia permits SF004716, CE000772; UNISINOS; Programa Antártico Brasileiro PPECEUA04.2017, PROANTAR nov. 2010, A14-SCI-ZOO-012; Nelson Mandela University Research Ethics Committee; Department of primary industries, parks, water and environment, Tasmania TFA 09198; 431; Ministry of research; Comite d'Ethique pour l'Expérimentation Animale Languedoc Roussillon APAFIS#9497-2017100417123472 v2. Samples from Antarctica were collected with permits in accordance to Annex II, Article 3 of the Protocol on Environmental Protection for Antarctic Research (SCAR) provided by the countries involved in this study.

#### Genome sequencing and assembly

DNA was isolated using a salt extraction protocol (4) with slight modifications (2). A total of 100 ng of genomic DNA was fragmented to 350 base pairs (on average) using a Covaris E220 focused ultrasonicator (USA). The sheared DNA was used to construct paired-end libraries using the Illumina TruSeq Nano kit. Fragmented DNA was treated with end repair mix, with A-tailing mix, and a ligation enzyme to attach the Illumina indexed adapter and barcode. Six PCR cycles were used to enrich ligated DNA using Illumina adapters. Amplified libraries were purified with beads and quantified using a Qubit fluorometer and the library size was measured with an Agilent TapeStation. The libraries were then sequenced to ~30x coverage (Table S3) with 150 paired-end reads using an Illumina HiSeq X platform at MedGenome (USA).

To process the raw reads obtained for each species, exact duplicates were removed using Super Deduper (<https://github.com/dstreett/Super-Deduper>). The reads were then filtered using Cutadapt (5) and Trimmomatic (6) to trim adapters and low-quality reads. The remaining overlapping paired-end reads were merged using FLASH (7). We then aligned the resulting cleaned reads of each individual to an emperor penguin draft genome (<http://gigadb.org/dataset/100005>; scaffold-level assembly) using LAST (<http://last.cbrc.jp/>). LAST is more sensitive to finding similarities and is capable of finding similar regions in spite of mismatches and gaps between reads and the reference genome. LAST handles sequence quality data better during mapping than some other algorithms (8). For each penguin species, the resulting alignment in LAST MAF format was converted to sorted BAM format using maf-convert and SAMtools (9). Finally, we used SAMTools/bcftools and vcfutils.pl vcf2fq (9) to call genotypes in order to generate individual consensus sequences (in fastq format). We kept a consensus base only when the sequence depth was >10X and masked sites within a 5 bp window around an indel. We converted fastq to fasta using seqtk (<https://github.com/lh3/seqtk>) for each individual.

After mapping the data of each individual (Table S1) to the reference genome of the emperor penguin, each reconstructed genome was of equal length. Therefore, we used the reference genome GFF based on the annotations from GeneWise for gene predictions, to extract coding sequences (CDS) and introns (of each gene) for each individual. The CDS and intron sequences for all species were then aligned using MAFFT (10) and trimAl (11) was used to trim ambiguous regions in the alignment (Commands: trimal



-in \$in -out \$out -block 20 -resoverlap 0.3 -seqoverlap 30 -keepseqs -gappyout). We used a conservative filter and removed loci if more than 30% missing data (Ns) was present across 30% of the individuals. We also removed loci from the alignment if the proportion of shared polymorphic sites at any locus was greater than 20%. Penguins and giant petrel raw fastq reads, reconstructed genomes (BioProject PRJNA530615, BioSample accession SAMN11566608-SAMN11566630) and mitogenomes (MK760983-MK761004, MK761006) were deposited in Genbank. All UCE, CDS, intron and mitogenome alignments, dated phylogenies and scripts for all data analyses are available at Dryad (<https://doi.org/10.5061/dryad.pk0p2ngj2>). Scripts are also available at the Github indicated below.

Code for the above available at:

[https://github.com/CGRL-QB3-UCBerkeley/denovoTargetCapturePhylogenomics/blob/master/1-ScrubReads\\_e](https://github.com/CGRL-QB3-UCBerkeley/denovoTargetCapturePhylogenomics/blob/master/1-ScrubReads_e)

### Assessment of genome assemblies

The statistics of the final assembled genomes were assessed using `asmstats.pl` (<https://github.com/calacademy-research/ccgutils/tree/master/asmstats>), a modified version of the `assemblathon_stats.pl` statistics program from Assemblathon 2 (12) (Table S3, Fig. S1).

Benchmarking Universal Single-Copy Orthologs (BUSCO v2 (13) with the argument `--limit 20` in genome mode (Table S4, Fig. S2) were used to show the reference-based assembly performed was sufficient to recover nearly all the single-copy protein sequences predicted in the avian lineage dataset (4915 BUSCO `aves_odb9`). BUSCO uses the gene prediction program Augustus v3.2.6 (Augustus: Gene Prediction, RRID:SCR\_008417; (14)), HMMER 3.1b2 (<http://hmmerr.org/>), and the Basic Local Alignment Search Tool (BLAST+) v 2.6 (National Center for Biotechnology Information [NCBI] BLAST).

Genomes were evaluated using KAT spectra-cn plots (15) to assess motif representation and to detect possible bias in assembly of using the emperor penguin species genome as a reference for all the species. We generated a k-mer spectrum plot (histograms plotting number of distinct k-mers at each frequency) for each of the 22 penguin genomes to obtain information such as the data quality (level of errors, sequencing biases, completeness of sequencing coverage with the KAT `sect` option, and potential contamination) and genomic complexity (size, karyotype, levels of heterozygosity, and repeat content) (15). We used the function `Kat comp` and k-mer length of 27 bp to compare K-mers generated from clean reads to those from the assembled genome for each species, and in comparison to the reference emperor penguin genome (NCBI ASM69914, Fig. S3, S4). Spectra-cn plots provide information of k-mer content type and the number of copies from the fastq reads that became part of the assembly (15). These histogram plots are derived from a matrix of the total number of distinct k-mers found in the fastq reads versus the frequency of each distinct k-mer found in the fastq reads. The total number of times a distinct k-mer occurs in the assembly is then used to paint the histogram assigned colors. Black is assigned to k-mers not found in the assembly and red is assigned to k-mers that occur once in the assembly (see figures for color assignments).

Code for the above available at:

<https://github.com/calacademy-research/ccgutils/tree/master/asmstats>

### Gene trees and species tree

We performed the Ultra Conserved Elements (UCE) capture using scripts from the PHYLUCe pipeline available at <https://github.com/faircloth-lab/phyluca> (16). This pipeline includes an *in silico* pipeline for identifying UCE loci from whole genomes, by aligning the genome's contigs and scaffolds to a probe set of 5060 UCE loci specific for tetrapods (17). The script `probe_run_multiple_lastzs_sqlite` was used to align the 120 bp length UCE probes to the genomes. The UCE loci and their respective 750 bp flanking regions were then sliced from the genomes using the script `probe_slice_sequence_from_genomes`. Because our 30x genomes are not complete, some missing data is expected, which means that not all UCes were recovered for all taxa (18). To mitigate the effect of missing data, we included in the final alignment only UCE loci recovered from a minimum of 18 individuals (we sequenced 23 individuals). Sequences were aligned using MAFFT (10) commands: `mafft --inputorder --leavegappyregion --threadit 0 --allowshift --unalignlevel 1 --anysymbol --retree 1 --thread $thread --maxiterate 1000 --globalpair $raw >`

\$mafftaln\_raw. The sequences were concatenated using the script “catfasta2phymI.pl” (available at <https://github.com/nylander/catfasta2phymI>). Although some UCE may occur within introns, and/or can overlap with coding regions (19), there are likely to be very few in number and consequently these were not filtered.

The mitochondrial sequence from each taxon was recovered by extracting pairs of reads that matched penguin mitochondrial sequences from NCBI GenBank previously published by (20). We used BLATQ version 1.02 (<https://zenodo.org/record/61136#.XQFsc29Kjys>) to match reads from the fastq pair of files (forward and reverse strand reads) for each individual; then we used a custom script to extract reads into a pair of fastq files representing the mitochondrial reads. For each individual the reads were imported into Geneious R11 (<https://www.geneious.com>) and the De Novo Assemble tool was used to generate the consensus assembly for the mitochondrion. Assembled mitogenomes were aligned with other available penguins (20); with our dataset comprising a total of 32 mitochondrial genomes and the giant petrel outgroup.

The most appropriate models of sequence evolution for each alignment were determined using ModelFinder (21) as implemented in IQ-TREE version 1.6.8 (22). For the concatenated phylogenomic analyses (without partitions) we performed analyses with and without the inclusion of the yellow-eyed penguin due to the more fragmented nature of the assembled genome given that we sequenced this individual from a skin sample off an old museum study skin (MVZ 149367). The full dataset with yellow-eyed penguin omitted comprised a total of 23,108 loci (CDS 11,011 loci; intron 8,040 loci; UCE 4,057 loci; Fig. S5, Table S5-S6); and with yellow-eyed penguin included comprised 9,103 loci (CDS 4,668 loci; intron 2,610 loci; UCEs 1,825 loci; Fig. S6, Table S5-S6); both datasets included the mitogenome (Fig. S7). The nucleotide substitution models selected were GTR+F+R2 for CDS, GTR+F+R2 for intron, GTR+F+R3 for UCE, and TVM+F+I+G4 for the mitogenome. The same models were selected for each marker with and without the yellow-eyed penguin included in the dataset. We carried out maximum likelihood (ML) analyses in IQ-TREE, with 1000 bootstrap replicates using the ultrafast bootstrap approximation (UFBoot, Fig. S5-S6) (23).

To account for potential genome-wide incompatibilities among taxa and loci, we used the species tree summary method incorporated by Astral-III (24) to estimate a species-level phylogeny that included yellow-eyed penguin for each of the UCE (1,825 loci), intron (2,610 loci), and CDS (4,668 loci) data sets, and one for all three datasets combined (9,103 loci) (Fig. S8). We used RAxML-NG (v. 0.5.1b BETA) (47) to generate independent gene trees for each locus of the UCE, intron, and CDS alignments. As input for Astral-III, we combined all of the RAxML-NG (v. 0.5.1b BETA) (25) maximum likelihood trees from each locus alignment into a single file. To achieve this, we wrote a python scripts enabling the parallelization of RAxML-NG analyses to generate input trees for Astral-III and a set of scripts to run Astral-III. Branch support values were calculated as local posterior probabilities computed in the context of the multispecies coalescent by a quartet-based support algorithm using quadripartition (the four clusters around a branch) (26). We chose the Astral-III summary method over full species-tree inference under the multispecies coalescent (e.g. \*BEAST) because of the large size of the dataset (27).

*Code for the above available at:*

[https://github.com/CGRL-QB3-UCBerkeley/denovoTargetCapturePhylogenomics/blob/master/4-](https://github.com/CGRL-QB3-UCBerkeley/denovoTargetCapturePhylogenomics/blob/master/4-TransExonCapPhyloV3.3.8)

[TransExonCapPhyloV3.3.8](https://github.com/freitas-lucas/UCES)

<https://github.com/freitas-lucas/UCES>

<https://github.com/calacademy-research/RAxML-NG-Astral-III>

[https://github.com/calacademy-research/RAxML\\_Astral\\_trees](https://github.com/calacademy-research/RAxML_Astral_trees)

### Estimation of Divergence times

We estimated divergence times in BEAST v2.5.2 (27) for UCEs and mitogenomes including all taxa using the computer resources available through the CIPRES Science Gateway (Fig. S7, S10) (28). We did not use a fixed topology (e.g. the maximum likelihood tree) once we recovered the same topology with BEAST. Dating was performed using the GTRGAMMA model with base frequencies empirically estimated. We used a relaxed-lognormal clock under the calibrated Yule speciation process with fossil calibration distributions following (29). The five fossil calibrations we used are detailed in Table S8 and the position of the four internal calibration points are depicted on Figure 1. The calibration used followed the parameters used by Cole et al. (2019).

The root (i.e. Sphenisciformes / Procellariiformes node) was calibrated using the oldest known Sphenisciformes fossil, *Waimanu manningi* (30), with a lognormal prior distribution mean of 3.7, standard deviation of 1.0, and offset of 60.5 million years ago (Mya). The mean and standard deviation values of the lognormal prior specify a minimum age prior of 60.5 Mya, which corresponds to the minimum age of the locality of the species' type, and a maximum constraint of 72.1 Mya, which corresponds to the age of the boundary of the uppermost stage of the Late Cretaceous, the Maastrichtian stage, as described by (29).

A second fossil calibration was placed in the crown Spheniscidae where *Aptenodytes* diverges from the other genera. We used the fossil species *Madrynornis mirandus*, and following (31) with a uniform prior distribution and an offset of zero (0.0). The minimum age prior was 9.7 Mya, which corresponds to the minimum age estimate of the only specimen of this fossil from the Puerto Madryn Formation ( $10 \pm 0.3$  Mya, (31)), and a maximum age prior of 25.2 Mya, which is considered as the maximum age bound of crown penguins, in accordance with the estimated maximum age of New Zealand's Kokoamu Greensand formation, in which a wide variety of crown and stem fossil penguins have been found (29). *Madrynornis mirandus* has been considered a close relative to *Eudyptes* (31, 32), to *Spheniscus/Eudyptula* (33), and as a sister-taxon to Spheniscidae (34). Even though the exact position of the fossil is uncertain, its position at the base of the crown-group is the most commonly accepted placement (33).

The third calibration prior was placed at the stem node of *Pygoscelis* using the fossil *Pygoscelis calderensis* with a lognormal distribution, mean of 6.0, standard deviation of 1.0, and offset of 6.3 Mya. The mean and standard deviation values of the lognormal prior specify a minimum age of 6.3 Mya given that the fossil was found in the Bahía Inglesa Formation of Chile with an estimated K-Ar age of  $7.6 \pm 1.3$  Mya (35). The maximum age prior was 25.2 Mya, following the same rationale for constraining the crown Spheniscidae as outlined above.

The fourth calibration prior was placed along the node uniting *Spheniscus* and *Eudyptula*, placing the fossil *Spheniscus muizoni* using a lognormal prior distribution, mean of 4.4, standard deviation of 1.0, and an offset of 9.2 Mya. The mean and standard deviation values of the lognormal prior specify a minimum age of 9.2 Mya derived from the stratigraphic position of the fossil in the Pisco Formation (Peru), which recent studies estimate to have a minimum age bound of 9.2 Mya (36). The maximum age prior was set to 23.03 Mya, which corresponds with the onset of the Miocene; to date no *Spheniscus* or *Eudyptula* fossils have been found in Oligocene deposits (37, 38).

Finally, the fifth calibration prior was placed along the node uniting *Eudyptes* and *Megadyptes*, in which an undescribed *Eudyptes* sp. fossil with a lognormal prior distribution, mean of 7.04, standard deviation of 1.0, and offset of 3.06. The mean and standard deviation values of the lognormal prior specify a minimum age of 3.06 Mya, which is the minimum age bound of the Tangahoe Formation (New Zealand) (39) in which the fossil was found, and a maximum age prior of 25.2 Mya, following the same rationale for constraining the crown Spheniscidae as outlined above. The conservative maximum bounds in the Oligocene (i.e. 25.2 Mya) used in most calibrations in our study, as well as other studies of crown-group penguins (e.g. (29)) was chosen in the absence of a better-known fossil interval for most of the fossil the taxa.

The MCMC was run over two independent runs: 500 million for the UCE, and 100 million generations for the mitogenome datasets for each run, sampling parameters every 10,000 generations. The output log files were analyzed in Tracer v.1.7.1 (40) and trees were summarized using TREEANNOTATOR (27) with a 10% burn-in. We ran the sample from the priors to evaluate how divergent our posterior probability distribution is for both UCE and mitogenomes of the calibrated phylogenies with and without the sequence data. The ESS values obtained for UCE were 42 without data and 3550 with data, while mitogenomes were 28 and 2595, respectively. The results suggest that the data have sufficient signal to estimate the parameters without being dominated by the prior selection. These results are expected since the selection of tree prior (under a Yule process) and molecular clock has almost no impact on the diversification rates estimates when sequence data are sufficiently informative and have low to moderate substitution rate heterogeneity (41).

The subsequent analysis to detect signatures of positive selection (see below) used the calibrated phylogeny for all taxa rooted on the giant petrel as an outgroup. For ancestral range and niche reconstruction (see below) we used the calibrated phylogeny pruned to one exemplar per species with redundant taxa removed: (I) macaroni/royal penguins reduced to a single lineage following recent papers (42, 43) and our analyses (Fig. S5-S8; macaroni penguin from Antarctica was retained); (II) we reduced the four gentoo penguin lineages to a single lineage by choosing the most divergent lineage of gentoo penguin

(Crozet Archipelago); and (III) removed the outgroup. Pruning was performed using the package *ape* (Analyses of Phylogenetics and Evolution) v5.3 (44).

### Historical biogeographic analyses

For the historical biogeographic analysis, we estimated the ancestral range of the extant penguin species in the R package BioGeoBEARS (45). BioGeoBEARS implements three models of ancestral area reconstruction: Dispersal-Extinction-Cladogenesis (DEC) (46), Dispersal-Vicariance Analysis (DIVA) (47), and BayArea (48). Each of these methods allows the inclusion of a set of anagenetic (e.g. dispersal; extinction) and cladogenetic (e.g. sympatry; vicariance) processes as parameters (Table S9, Fig. S11). In addition, BioGeoBEARS can also include the parameter *j* (“jump dispersal”), which accounts for founder-event speciation (49) as an additional variable to the above models. The founder-event speciation parameter from BioGeoBEARS allows a daughter lineage to have a different range from the parental lineage during a cladogenetic event, an important feature to be considered for seabirds that often breed on remote islands (50).

BioGeoBEARS estimates the likelihood of the ancestral states (i.e. ancestral range) at the nodes of the phylogeny, using as input the dated phylogenetic tree and a geographic file containing an adjacent matrix coding the current distribution of the species. The phylogenetic tree used as input in BioGeoBEARS must have only one representative of each species (or monophyletic populations) at the tips of the tree. Thus, we pruned the dated phylogeny (Fig. 1) to include only 18 taxa (one representative of each penguin species, for details see above). The geographic adjacent matrix depicts the areas where each species natively breeds in a presence/absence matrix. Each area is considered as a character state in the tree, and the output tree contains the set of areas (i.e. range) covered by the ancestral lineages of Spheniscidae. We tested all previously mentioned models alone (i.e. DEC, DIVALIKE, BAYAREALIKE), and with the addition of the founder-event speciation parameter *j* (i.e. DEC+J, DIVALIKE+J, BAYAREALIKE+J) (51).

For determination of each species' occurrence when coding the adjacent matrix, we followed the current distribution of penguin colonies or breeding range along continental margins and islands as described in Bertelli and Giannini (52), Handbook of the Birds of the World and BirdLife International (53). We subdivided the extant penguin geographic distribution into 10 different areas: A) South American coasts and Falkland/Malvinas Islands; B) Scotia Arc Islands; C) Antarctic Peninsula; D) Continental Antarctic; E) Tristan da Cunha and Gough Island; F) Bouvet Island; G) South African coast; H) Indian ocean Islands; I) Australia/New Zealand coasts and nearby islands; and J) Galápagos Islands (Fig. 1).

Our selection of 10 areas is based on the current understand of the biogeography, ecology, and biology of penguins. We took into consideration the location of nesting sites along continental margins and on island coasts, the extent to which biogeographic units are isolated (completely or partially) from each other due to oceanic fronts (e.g. Antarctic Polar Front, and Subtropical Front) or geographic distance, and degree to which the faunal composition of penguin species differs across the Southern Ocean.

Specifically, we separated the South American coast (area A) from the Galápagos Islands (area J), because the Galápagos penguins are endemic to the Galápagos Islands whereas the two South American *Spheniscus* overlap in distribution along the continental margin. The South American coast and the Falkland/Malvinas Islands (area A) are home to the Humboldt and Magellanic penguins, and are separated from the Scotia Arc Islands (area B) by the Antarctic Polar Front, which forms a major biogeographic break between these areas for several marine species including penguins (1). These two areas (A and B) as well as the Antarctic Peninsula (area C), and Continental Antarctica (D), are separated by each having distinct penguin species composition: the Antarctic Peninsula encompasses the range for the three *Pygoscelis* species (Adélie, chinstrap and gentoo penguins), and on Continental Antarctica Adélie and emperor penguins occur, which show reduced population structure (54, 55) suggesting that Antarctica need not be further subdivided. Tristan da Cunha and Gough islands (area E) are situated to the north of the Subtropical Front and the only penguin species to occupy these islands is the northern rockhopper. Bouvet Island (area F) is thousands of kilometers distant from the other penguin breeding colonies distributed to the south of the Antarctic Polar Front. The South African coast (area G) is home to a single endemic penguin species, the African penguin. The western Indian ocean encompasses a group of islands (area H: Marion, Prince Edward, Crozet, Kerguelen, Amsterdam Islands) that are similar in penguin faunal composition. Finally, Australia and New Zealand (I) both share little penguin.

## Ancestral Niche Reconstruction

Occurrence records for all penguin species were retrieved from GBIF. Spatial data was filtered by IUCN distribution ranges with a resolution of 10x10 km. Six marine variables (max/min temperature, max/min salinity, and max/min primary productivity) taken from the Bio-Oracle repository (56) were used to create raw models with MaxEnt–Javascript (57). From here we estimated the extent of niche overlap between all penguin species for the set of variables considered (58). We used the package ‘Phyloclim’ to create Predicted Niche Occupancy (PNO, Fig. S12) profile values and plots (59). Subsequently we combined this information with the phylogenetic tree for penguins generated in this study. This was done by calculating the weighted means of niche dimensions for each species and expressing them through phylogenetic relatedness over time to estimate ancestral climatic tolerances (59). As a result, we obtained Divergence Through Time plots and climatic tolerance chronograms (Fig. 1, S13).

Code for the above available at:

<https://github.com/mjfrugone/Predicted-Niche-Occupancy.git>

## Interspecies introgression

Introgression analyses were performed using a partitioned *D*-statistics approach implemented in DFOIL (60). All clades were sampled following the software requirement of a symmetrical tree composed of four taxa and an outgroup, one ingroup clade being younger than the other, for eight combinations of taxa (Fig. S9, Table S7). To perform the tests, we split the genome-wide alignments into 100 kb, non-overlapping windows with Bedtools and custom scripts. The 100kb is the recommended window length based on the simulations performed by the authors of DFOIL. Windows smaller than 100kb has an increase proportion of false positive results and windows bigger than 100kb may include two sample regions with differing recombination rates. We considered a window to be introgressed if it had a p-value < 0.05. We parsed DFOIL output to obtain the percentage of windows with each type of introgression signal.

Code for the above available at:

<https://github.com/henriquevf/Introgression-penguins>

## Demographic history

To address questions about climate and effective population size for each penguin, we performed a demographic analysis using a pairwise sequential Markovian coalescent (PSMC) method (61) based on whole-genome sequencing to elucidate effective population size through time. In order to prepare our data for input into an analysis using PSMC version 0.6.5-r67 (61), we used Samtools version 1.3.1 with HTSlib 1.3.1 (9, 62), bcftools version 1.3.1 (63), and the vcfutils.pl script from bcftools to call variants from the alignment derived from LAST with the command “samtools mpileup -C50 -uf ref.fa aln.bam | bcftools view -c - | vcfutils.pl vcf2fq -d 10 -D 100 | gzip > diploid.fq.gz”. As per the recommendation of the PSMC documentation (<https://github.com/lh3/psmc>), we used a third of the average read depth as the minimum read depth (-d) and at least twice the average read depth as the maximum read depth (-D) (-d 10 -D 100). PSMC was run with parameters “-N25 -t15 -r5 -p 4 + 25\*2 + 4 + 6”. We estimated generation time (g) for the different penguin species based on the average maximum age at sexual maturity multiplied by a factor of two as suggested by (64): *Spheniscus* ssp. and little (g=8), chinstrap, gentoo, yellow-eyed, king (g=6), emperor (g=12), macaroni and royal (g=15) and the remaining *Eudyptes* species and Adélie (g=10) (Fig. 3, S16 Table S2). We assumed a nucleotide substitution rate of  $m = 1.91 \times 10^{-9}$  substitutions/site/year based on the chicken lineage (*Gallus gallus*) (65) multiplied by the generation time of each species. We performed 100 bootstraps to estimate uncertainty in the estimates of changes in effective population size through time.

We compared the generation time we estimated with that provided by IUCN, that estimate by Forcada et al. (66), and that based on the formula suggested by Lande et al. (67). The differences among these estimates of generation time was approximately three generations. Re-running our analyses with these different generation times does not significantly influence our estimates of the timing of the demographic events, but results in a more recent decrease of  $N_e$  for some species during the last glaciation.

### Detection of signatures of positive selection

Coding sequences were extracted from all species based on the available annotation for the emperor penguin using `gffread` (<https://github.com/gperte/gffread>). Every taxon was tested for the presence of in-frame start and stop codons and premature stop codons with custom scripts. We performed a  $dN/dS$  ratio test using the `Codeml` algorithm implemented in ETE3 (68, 69). We performed a site test (M7 vs M8) for all species and sub-groups in the phylogeny, focusing on the 4,562 genes that could be reliably compared across all taxa and that contained a start and stop codon at the beginning and end of the CDS, respectively. Table S10 reports the number of loci obtained after filtering for each species and their average length. The calibrated tree obtained from analyzing the UCE dataset was used. Due to the large number of analyzed genes, we performed a multiple comparison (false-discovery rate [FDR]) test implemented in R, with a  $q$ -value threshold of 0.1 using the alpha values extracted from the standard output of ETE3 as input (Table S11). Genes that persisted on the list (i.e. remained significantly different from neutral expectations, supporting a positive selection regime) were then used to perform a gene ontology and network analysis. We used `WebGestalt` (WEB-based GENE SeT Analysis Toolkit) (70) for the gene ontology analyses with the following parameters: overrepresentation enrichment analysis (ORA) as method of interest, and 'geneontology' as the functional database (Table S11-S13). The network analysis was performed with `StringDB` (71) with default parameters using human as reference (Fig. 2, S14, S15). For the genes of the network analyses we performed the overall and pairwise genome Z-tests ( $dN/dS$ ) to further evaluate positive and purifying selection (72). We further analyzed the sites under positive selection for the genes with the lowest  $p$ -value for the branch-site results (Table S12) and belonging to the network cluster related to specific functions (e.g. renal function, circulatory system, immunity, Figure 3). We employed the Mixed Effects Model of Evolution (MEME; 73) and Fast Unconstrained Bayesian Approximation (FUBAR; 74) tools implemented on the Datamonkey server (<http://www.datamonkey.org>; 75, 76; Figure S15). Default significance thresholds were used for both tools ( $p$ -value < 0.1 for MEME and posterior probability > 0.9 for FUBAR).

*Code for the above available at:*

<https://github.com/henriquevf/Selection-penguins/>

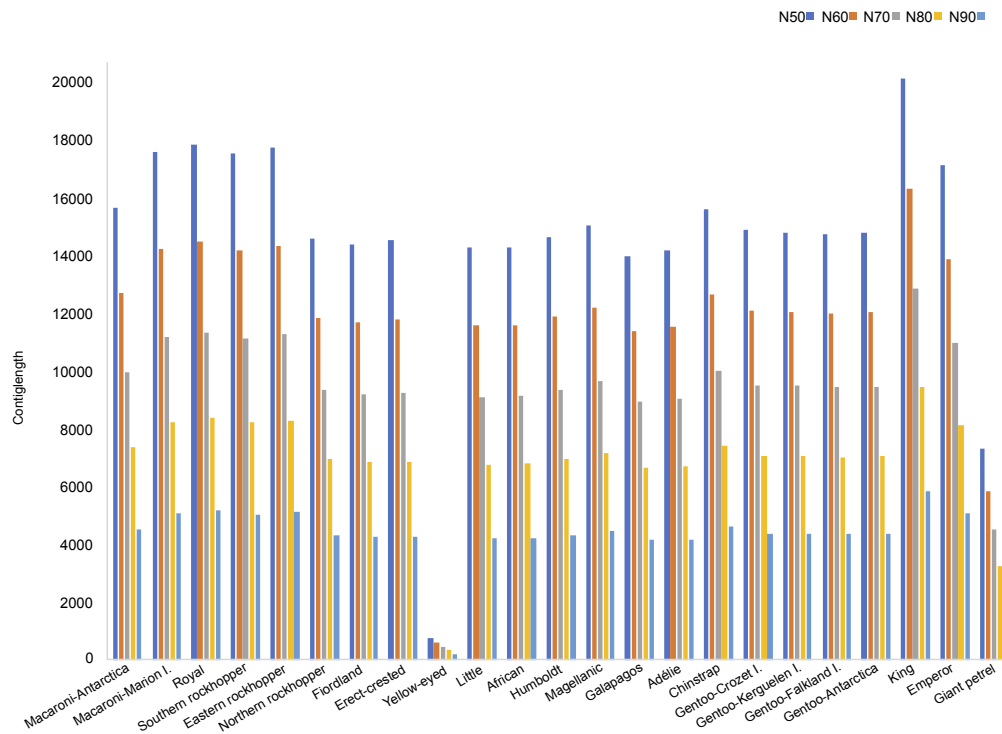

**Fig S1.** Data quality control for the 22 penguin genomes we sequenced. Summary statistics of scaffold assembly lengths, with the N50 (mean contig length) ranging between 13.9 kb for Galápagos penguin and 20.1 kb for king penguin: the yellow-eyed penguin was an exception, N50 = 0.75 kb. Genomes can currently be assembled using two main methods for assembling high throughput sequencing reads into longer contiguous genomic sequences to recover partial to near-complete genome sequences. De novo approaches assemble overlapped reads to build longer contigs and therefore reconstruct progressively the genome sequence (77). However, this method is generally unable to produce a single contig corresponding to the whole genome as non-contiguous sequences are frequent and require complex gap filling algorithms to infer their respective position (77). Assembly methods based on using a reference genome avoids such problems, as non-overlapping contigs will be placed in relation to each other based on the position of homologous sequences in the reference genome (78). Even if some areas cannot be filled by any reads, the vast majority of the partial genome will be accurately mapped, and this method has been widely used in studies similar to ours (79). Such accuracy will principally depend on the degree of identity between the reference and sequenced genomes, and phylogenetic proximity is generally considered as the best criteria for choosing a reference genome to assemble against (78). In the present study, we preferred the reference assembly method as a high-quality penguin species genome was already available and complied with the criteria of close phylogenetic relationship. Using a high-quality reference genome also has the advantage that with the mapping of each of our species to it, we can use the existing intron-exon boundaries to extract contiguous loci. Our phylogenetic reconstruction and divergence time estimates was based on a UCE dataset, the choice of genome assembly method should not have an effect on the phylogenetic hypothesis presented here and all other analyses based on this phylogeny (e.g. DTT, adaptation, introgression analyses) as our approach is similar to what several other authors have adopted when extracting UCE loci from short-read data. Further, all our nuclear genomic datasets (exon, UCE, introns) recovered very similar topologies with similar branches lengths between the exon and intron trees. This suggests that there is no particular bias in our approach.

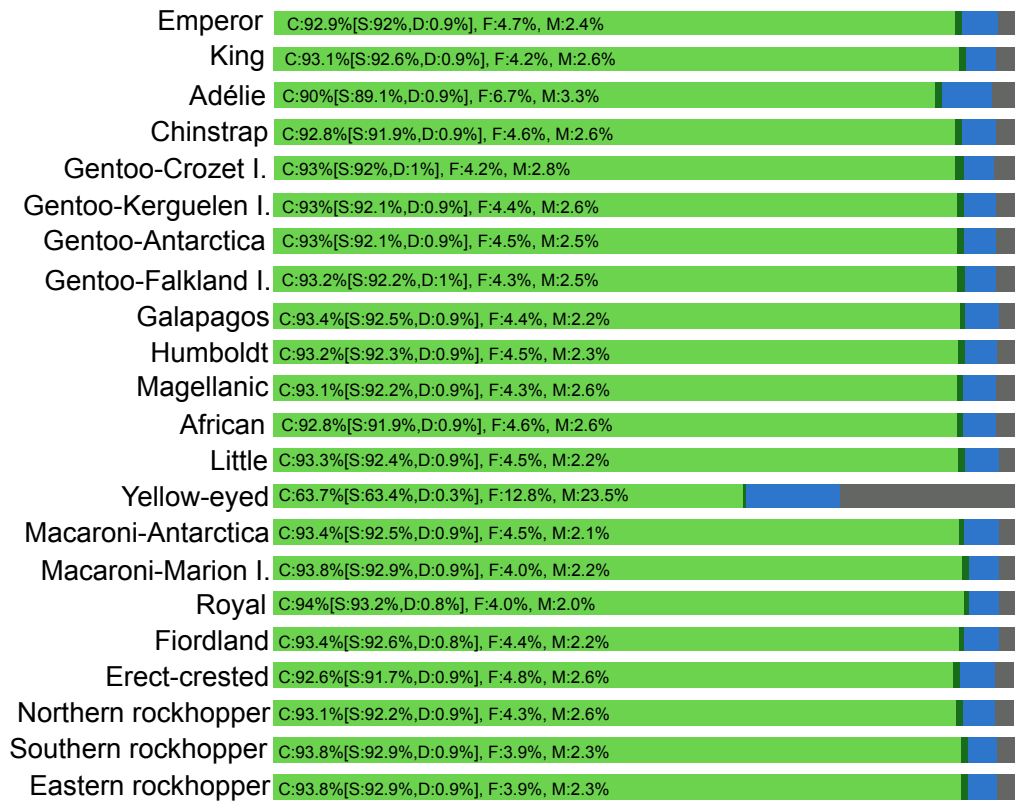

**Fig S2.** Results of benchmarking genome quality using the Universal Single-Copy Orthologs (BUSCO) locus set (n = 4915). Bar charts produced with the BUSCO plotting tool show proportions of BUSCO loci classified as complete (C, green + dark green), complete single-copy (S, green), complete duplicated (D, dark green), fragmented (F, blue), and missing (M, gray). Genome sequences had high BUSCO completeness scores (over 90%, with the exception of the yellow-eyed penguin ~63.7%, sequenced from a historical skin sample).



1

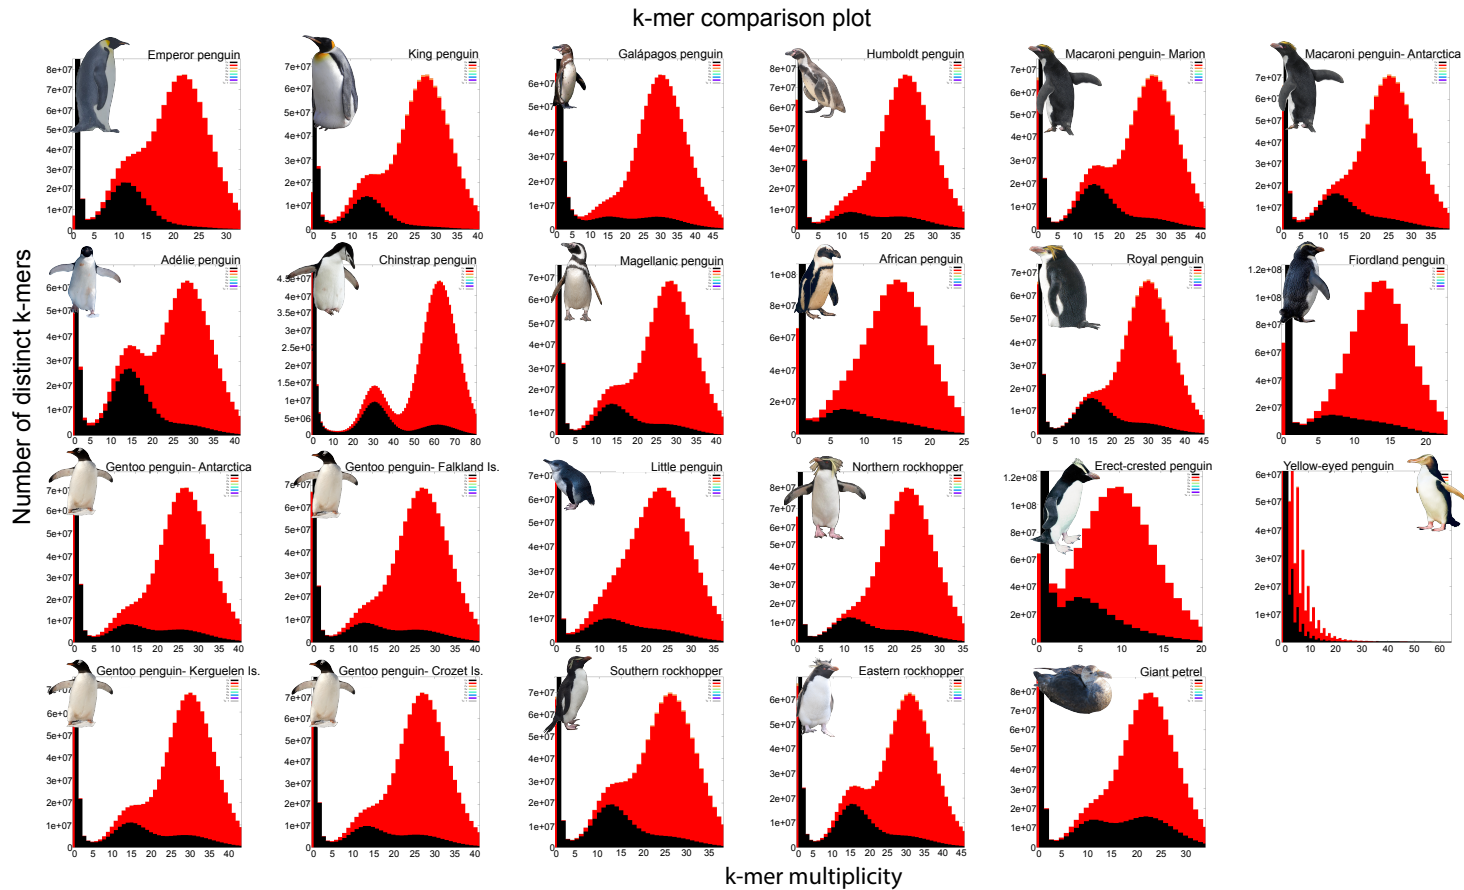

2

3 **Fig. S3.** KAT spectra-cn plots for all 22 penguin genomes and for the giant petrel, generated by comparing the paired-end reads to the reconstructed  
 4 scaffolds of each penguin taxon. Plots are colored to show the number of times k-mers from the reads appear in the assembly; frequency of  
 5 occurrence (multiplicity; x-axis) and number of distinct k-mers (y-axis). Black represents k-mers absent from the assembly; red represents k-mers  
 6 that appear once in the assembly; the other colors represent k-mers that appear multiple times, but these are very few and hence not readily visible  
 7 on the figures. Most genomes exhibited similar spectra-cn plots, with the majority of k-mers occurring in the assembly once (red distribution) and  
 8 few duplicates detected. Individual penguin spectra-cn plots showed a black distribution (zero occurrences in the assembly) at frequencies ranging  
 9 from 5-15 or 5-25. These black distributions represent k-mers spanning heterozygous regions where the De Bruijn graphing method rejects one of

10 the two SNPs spanning k-mers, reflecting the level of heterozygosity. Heterozygous content was high in chinstrap and Adélie penguins, followed by  
11 macaroni, southern and eastern rockhoppers, Magellanic, and king and emperor penguins. The exception was the genome sequence obtained from  
12 the historical specimen of the yellow-eyed penguin, where the spectra-cn plot revealed that half of the reads were not represented in the assembly  
13 (black), likely a consequence of the more fragmented nature of the genome assembly due to the presence of degraded DNA.  
14

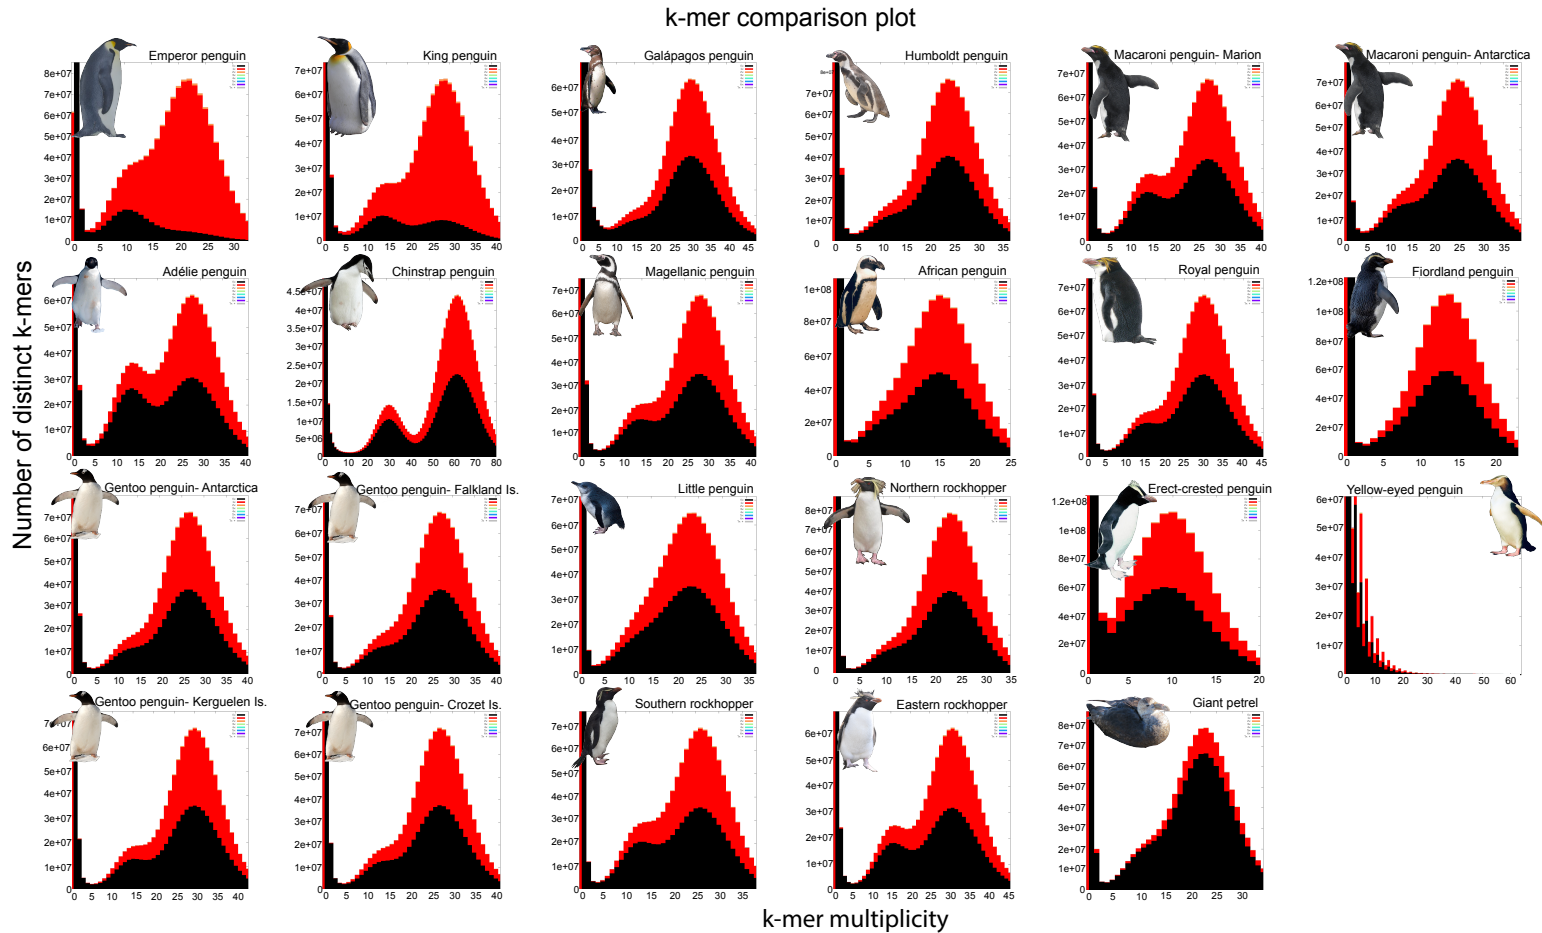

15

16 **Fig S4.** KAT spectra-cn plots for all 22 penguin genomes and for the giant petrel, generated by comparing the paired-end reads to the emperor  
 17 penguin reference genome (80). Plots follow those in Figure S3. Plots show a similar pattern as Figure S3, however, as expected, they show a  
 18 higher number of k-mers to be absent from the assembly.

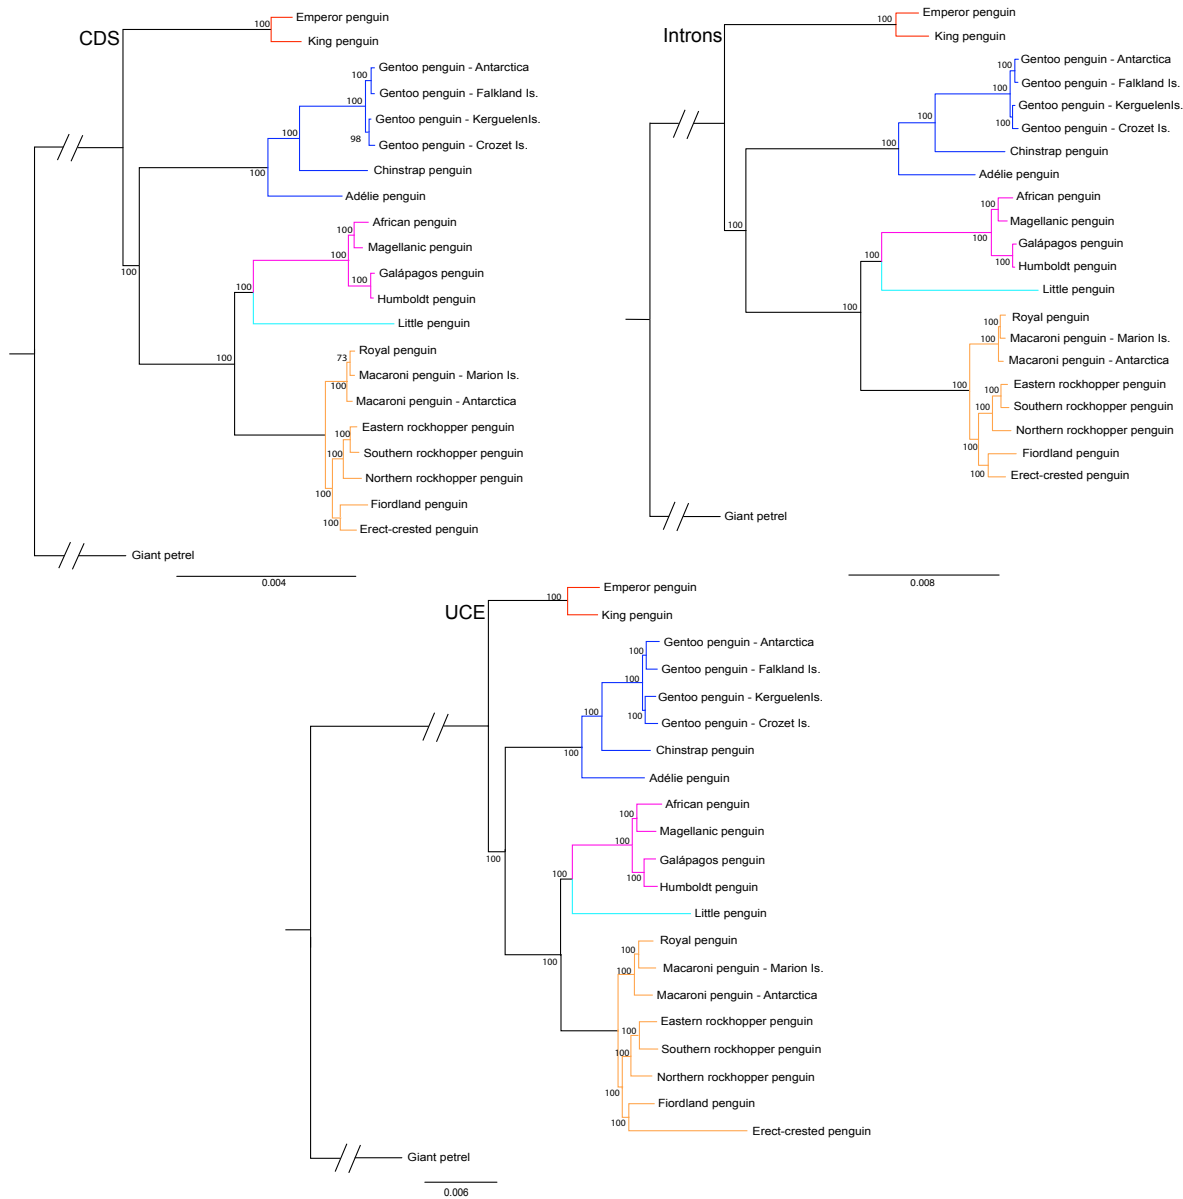

21 **Fig S5.** Maximum likelihood (ML) phylogenetic reconstruction of concatenated data for 21 genomes  
 22 (omitting yellow-eyed penguin) representing 18 penguin species with the giant petrel used as the outgroup.  
 23 ML topology for CDS, introns and UCEs. Node values indicate bootstrap support values. The total number  
 24 of loci used for tree reconstruction excluding the yellow-eyed penguin genome was 23,108 loci: CDS 11,011  
 25 loci; intron 8,040 loci; UCE 4,057 loci. Absence of monophyly was recovered for royal and macaroni  
 26 penguins; a result consistent with those of studies investigating population genetics of these taxa, which  
 27 have suggested that they be considered a single species (42, 43). All phylogenies generated from the  
 28 different datasets recovered a similar topology. All trees support the genus *Aptenodytes*, emperor and king  
 29 penguins, as the first diverging clade (as suggested by 32, 52, 81-83) as opposed to *Aptenodytes* being  
 30 placed closer to the tip of the phylogeny and sister to the smaller *Pygoscelis* penguins (29, 84, 85).  
 31 Moreover, the short internal branches recovered by our analysis at the divergence of *Aptenodytes* from  
 32 other penguins likely indicates that a rapid radiation occurred in less than 1 million years, possibly by

33 multiple cladogenetic events occurring simultaneously in various lineages (86). This may have led to the  
 34 recovery of the *Aptenodytes/Pygoscelis* clade by previous studies that used a small number of molecular  
 35 markers (or small fragments of the mitogenome (29)), which may have not separated concomitantly when  
 36 the lineages diverged. Fewer than 10 loci may be incapable of recovering rapid divergence events (87).

37

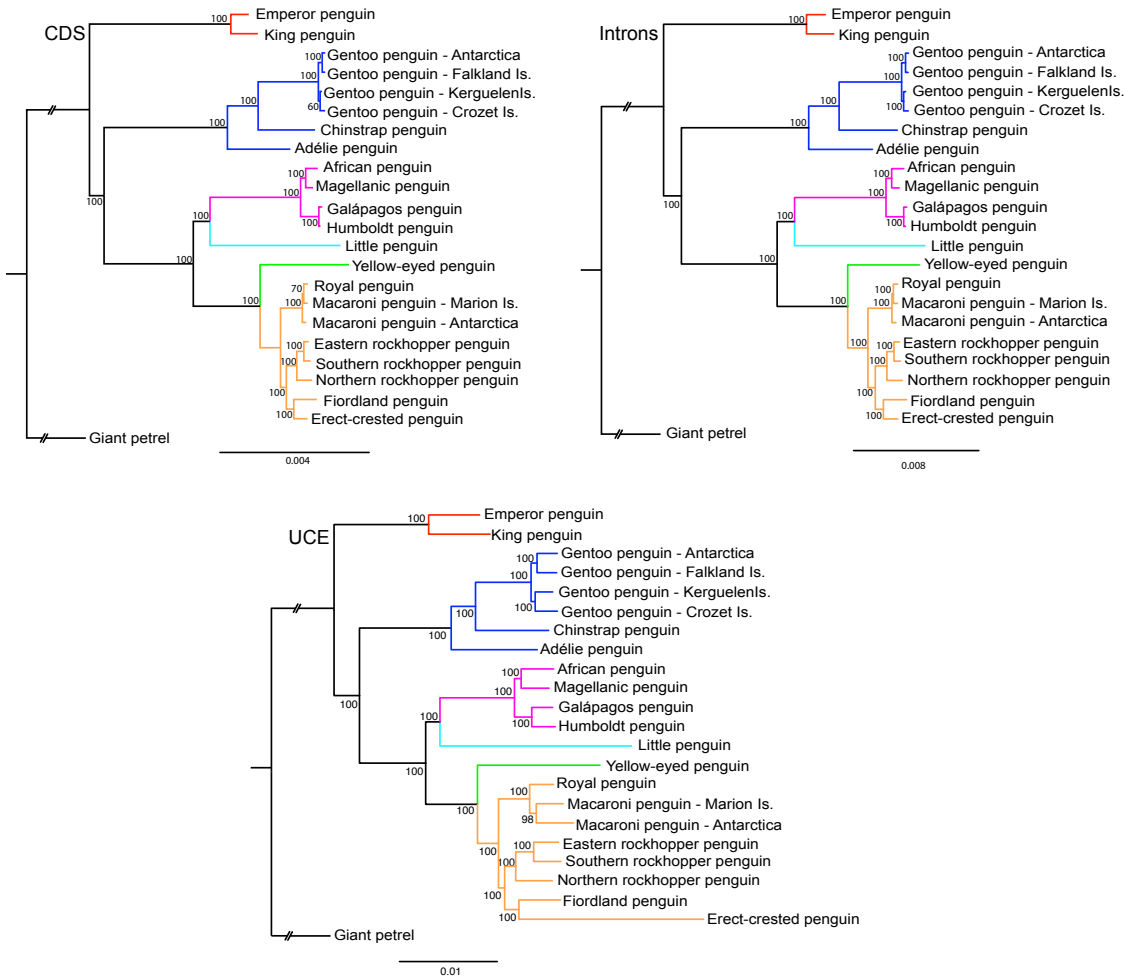

38

39 **Fig S6.** Maximum likelihood (ML) phylogenetic reconstruction of concatenated data for 22 genomes  
 40 representing 18 penguin species with the giant petrel used as the outgroup. ML topology for CDS, introns  
 41 and UCes. Node values indicate bootstrap support values. The total number of loci used for tree  
 42 reconstruction with the 23 individuals was 9,103 loci: CDS 4,668; intron 2,610; and UCE 1,825 loci. Absence  
 43 of monophyly was recovered for royal and macaroni penguins; a result consistent with those of studies  
 44 investigating population genetics of these taxa, which have suggested that they be considered a single  
 45 species (42, 43).

46

47

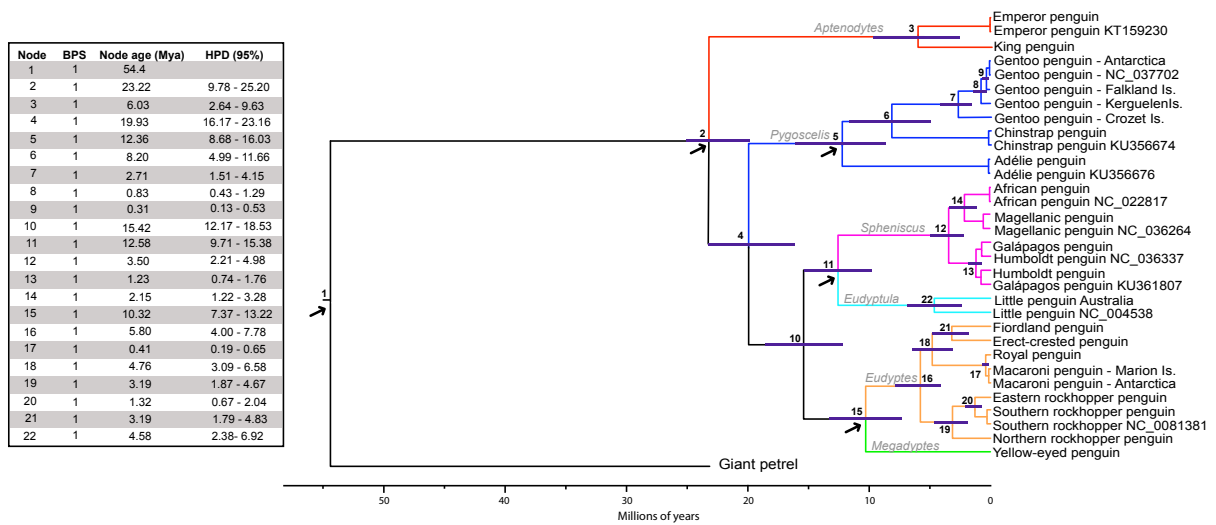

48

49 **Fig S7.** Bayesian phylogenetic (BA) inference using complete mitochondrial genomes for 32 individuals  
50 representing 18 penguin species. Numbers indicated on nodes corresponds to the accompanying table:  
51 Bayesian posterior probabilities (BPS), node age (Mya), HPD (95%). Arrows represent the five fossil  
52 calibration points used. In addition to the 22 newly generated mitogenomes, an additional 10 published  
53 penguin mitogenomes were include representing seven penguin species (20), plus little penguin from New  
54 Zealand (30); African penguin from South Africa (88); and southern rockhopper penguin (89). The giant  
55 petrel was used to root the phylogeny. The phylogeny showed a similar topology to that of our nuclear gene  
56 topology, with the exception of relationships among the seven *Eudyptes* species, and among the four  
57 lineages of gentoo penguins sampled. A deep divergence was observed between little penguin sequences  
58 from New Zealand and Australia (see also 90 and these lineages likely each warrant species status:  
59 *Eudyptula novaehollandiae* (Australia) and *Eudyptula minor* (New Zealand) (65). The lack of divergence  
60 between the four genomes of Humboldt and Galápagos penguins, and the three genomes of macaroni and  
61 royal penguins, may be explained by incomplete lineage sorting (ILS) and/or recent introgression. Although  
62 the topology of the phylogeny based on mtDNA is not in agreement with Cole et al. (29), their divergence  
63 time estimates were similar to our results.

64

65

66

67

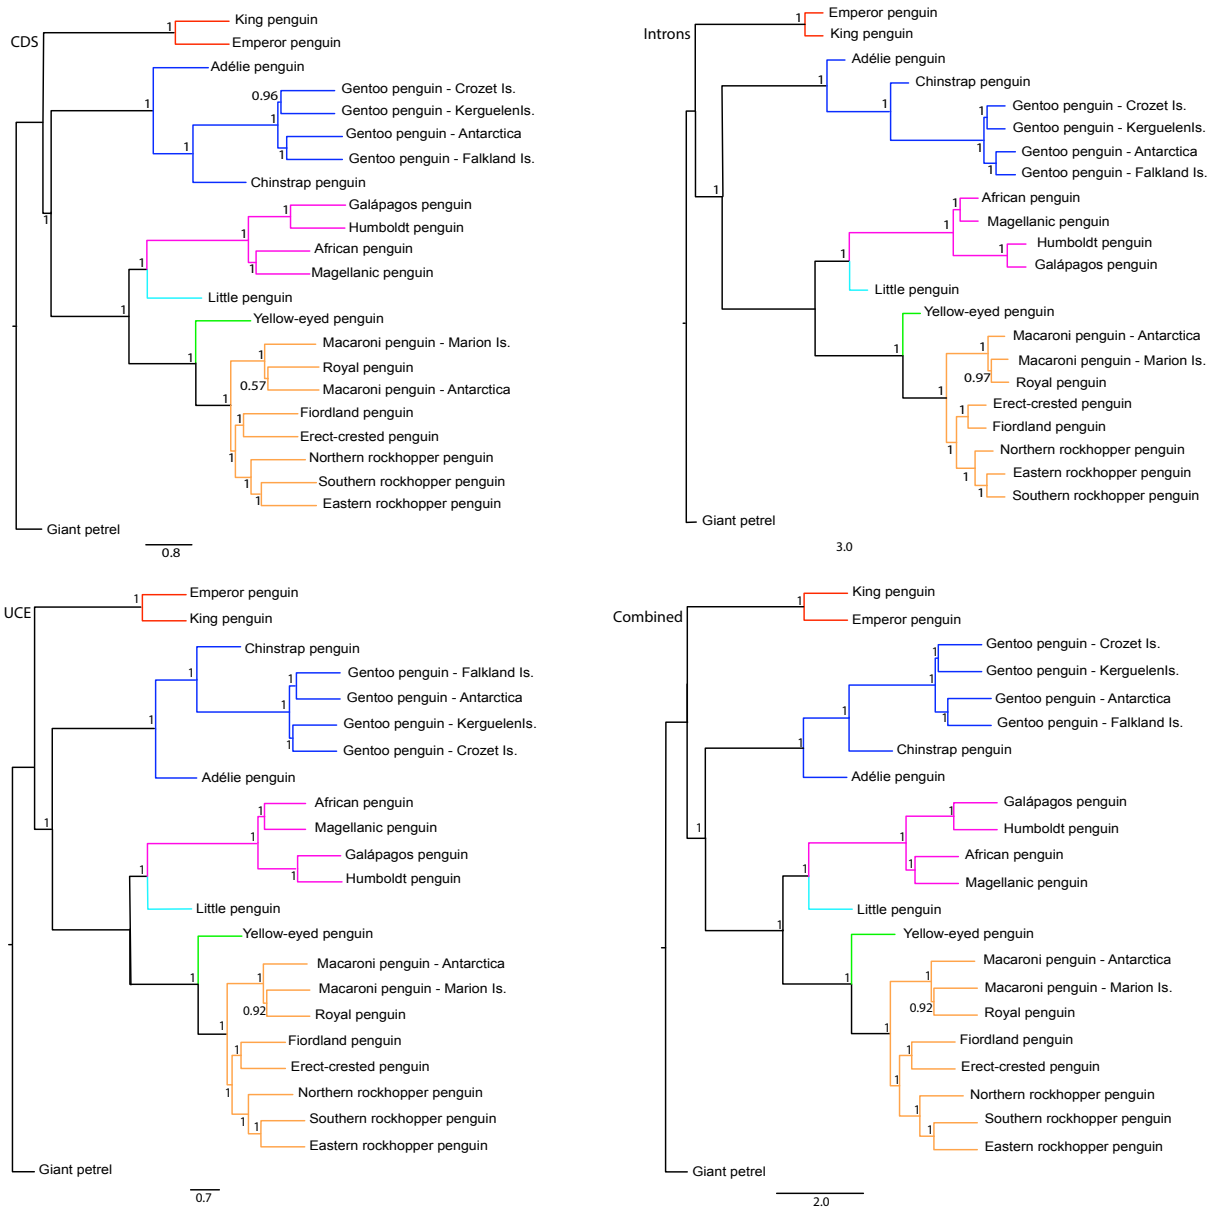

68  
69 **Fig S8.** Species tree retrieved using the program ASTRAL-III with individual gene trees generated for each  
70 locus and the combined dataset using RAxML-NG. Our phylogenetic hypotheses comprised 22 genomes  
71 representing 18 penguin species with the giant petrel used as the outgroup. The species tree for CDS,  
72 introns, UCEs, and the combined dataset are depicted. The total number of loci used for tree reconstruction  
73 with yellow-eyed penguin included was 9,103 loci: CDS 4,668; intron 2,610; and UCE 1,825 loci. As some  
74 UCEs may occur within introns or can overlap with coding regions, these different datasets may not  
75 completely independent. Branch support values are local posterior probabilities computed in the context of  
76 the multispecies coalescent by a quartet-based support algorithm using quadripartitioning (the four clusters  
77 around a branch; 26). All trees generated from the different datasets recovered a similar topology. Node  
78 values are posterior probabilities. All trees support the genus *Aptenodytes*, emperor and king penguins, as  
79 the first diverging clade (as suggested by 32, 52, 81-83) as opposed to *Aptenodytes* being placed closer to  
80 the tip of the phylogeny and sister to the smaller *Pygoscelis* penguins as recovered in some phylogenetic  
81 hypotheses (29, 84, 85).

82

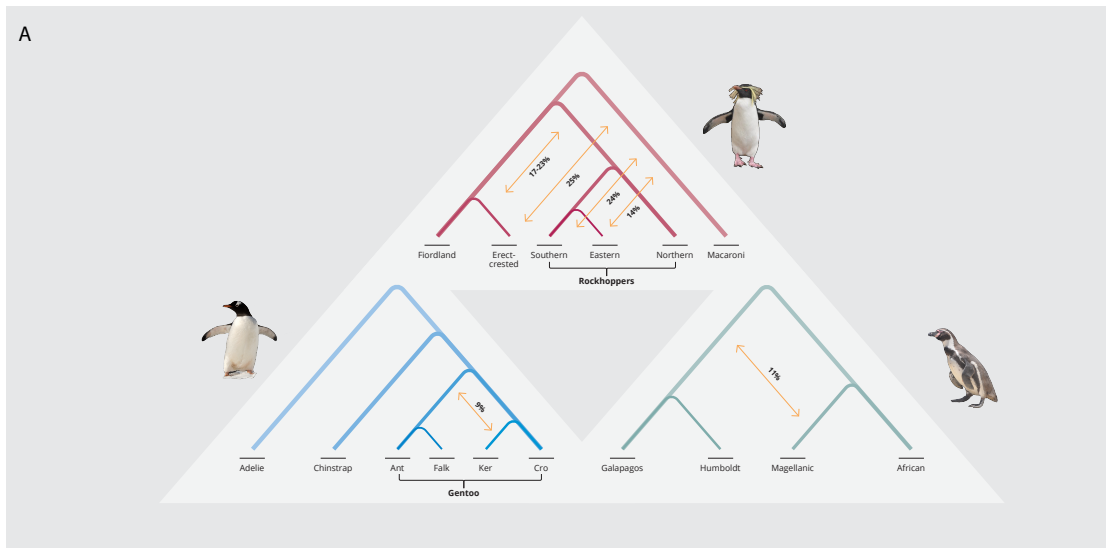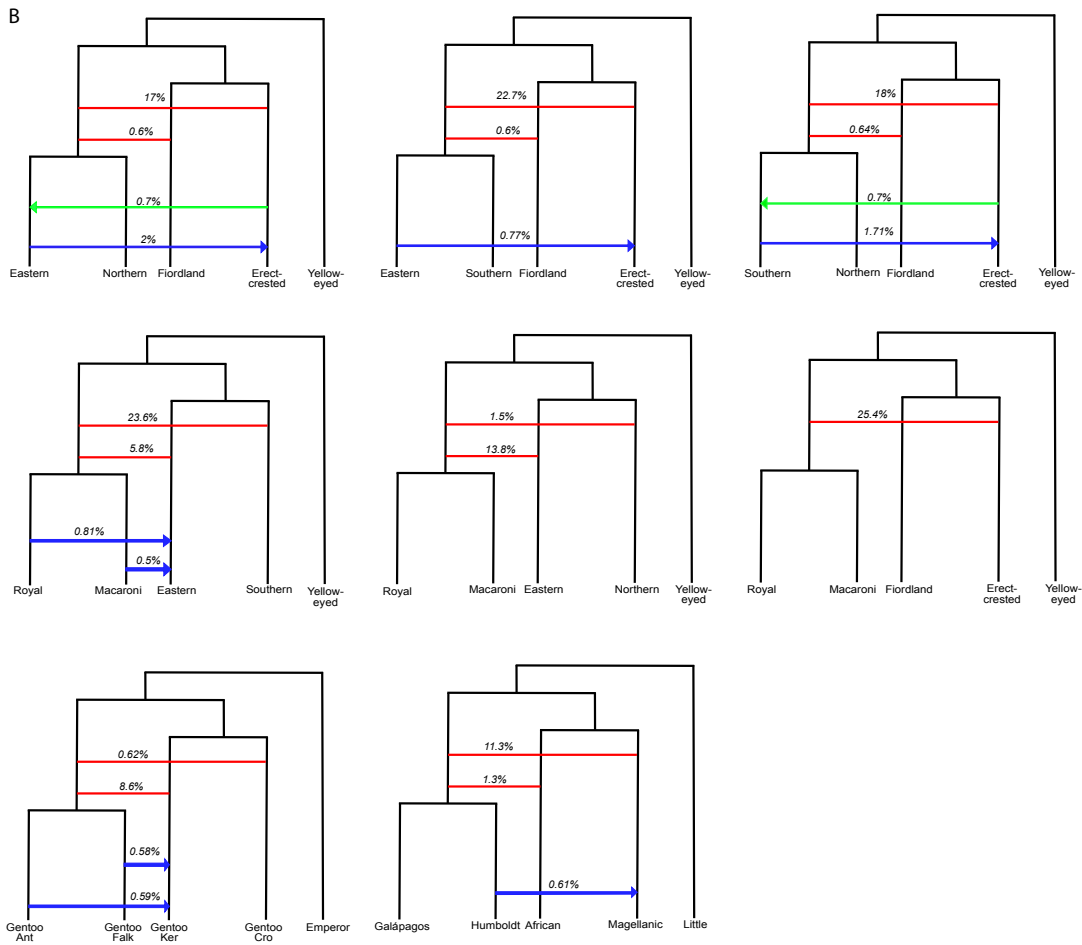

85 **Fig S9.** Introgression among species of penguins estimated using DFOIL. (A) Summary of introgression  
 86 recovered in the eight 5-taxon statement analyses in (B), (B) DFOIL results of introgression among eight  
 87 combinations of five penguin taxa. The arrows represent gene flow over 0.5% between taxa. Blue and



88 green arrows represent gene flow in two different directions between extant taxa. *Eudyptes* penguins  
89 appear to have exchanged genes through much of their evolutionary history, with extensive genome-wide  
90 introgression occurring between erect-crested and the ancestral rockhopper penguin species (17-23%) and  
91 between erect-crested and macaroni/royal (25%) penguins. We also recovered extensive genomic  
92 introgression between an ancestor of the Galápagos/Humboldt penguin and the Magellanic penguin (11%);  
93 Magellanic and Humboldt penguins are known to hybridize in the wild (91). Gentoo penguins exhibited  
94 genomic introgression (8.6%) between the Antarctic-South American clade with the lineage from Kerguelen  
95 Island. Signatures of more recent introgression episodes included genomic contributions from eastern and  
96 southern rockhopper penguins to the erect-crested penguin, as well the gentoo penguins from Antarctica  
97 and South America (Falkland/Malvinas) to Kerguelen. These results are consistent with the clockwise  
98 direction of the Antarctic Circumpolar Current (ACC) connecting sub-Antarctic islands and promoting  
99 dispersal and admixture.

100

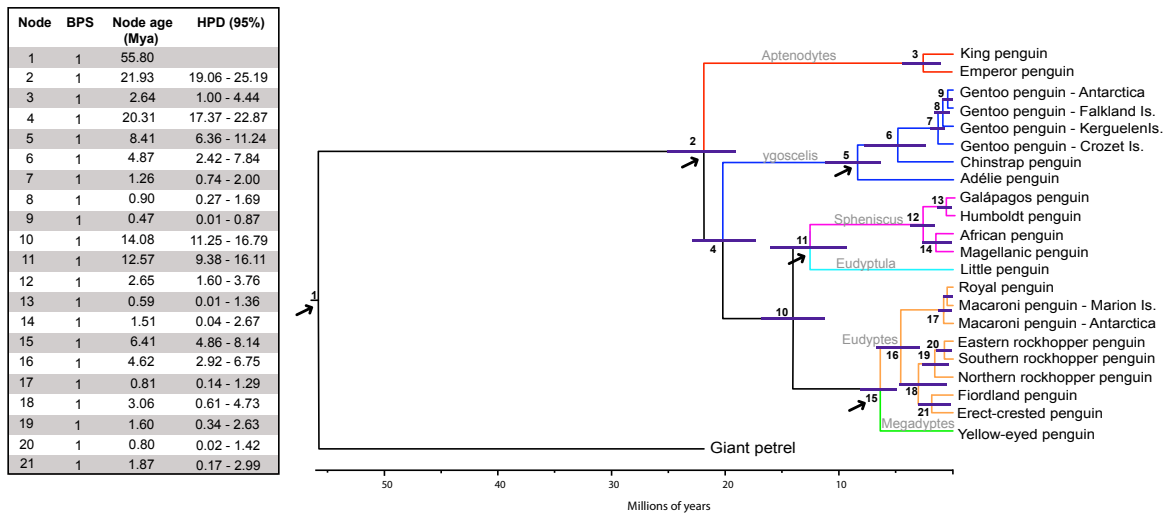

102  
 103  
 104  
 105  
 106  
 107  
 108  
 109  
 110  
 111  
 112  
 113  
 114  
 115  
 116  
 117  
 118  
 119  
 120  
 121  
 122  
 123  
 124

**Fig S10.** UCE Bayesian Phylogenetic (BA) inference with divergence time estimation generated using the software BEAST for penguins with the giant petrel as outgroup. Arrows represent the five fossil calibration points. Node numbers corresponds to those on the accompanying table: Bayesian posterior probabilities (BPS), node age (Mya), and HPD (95%) are reported. The ancestor of crown-group penguins was estimated at the early Miocene (UCE: 21.93 Mya; Mitogenome: 23.22 Mya). Initial opening of the Drake Passage was estimated between 45 and 24 Mya according to different authors (88, 89), with the most agreed date around 34 Mya (90, 91). Between 34 to 14 Mya, an ancestral volcanic arc east of the Drake Passage gateway was limiting the full ACC onset and the temperature in the Southern was relatively constant (92). During the middle Miocene climate transition, 14.2 to 13.8 Mya, the Southern Ocean cooled 6°C to 7°C due the intensification of atmospheric and oceanic circumpolar circulation increasing the isolation of Antarctic organisms (93). This period encapsulates the divergence between *Spheniscus*+*Eudyptula* and *Megadyptes*+*Eudyptes* (UCE: 14.08 Mya, Mitogenome 15.42 Mya) followed by the *Spheniscus*/*Eudyptula* split (UCE: 12.57 Mya, Mitogenome: 12.58 Mya). Full onset of the Drake Passage and the ACC is estimated around 11.6 Mya (94, 95), contributing to the diversification of several organisms of Antarctic marine fauna (96-102) and the colonization of new areas and diversification of most penguins (< 9 Mya). Approximately 10 Mya, ice became permanent in eastern Antarctica and around 5 Mya in Western Antarctica (103). Recent speciation of endemic penguins (< 5 Mya) might have occurred with island formation during the Pleistocene (e.g. Galápagos, Snares, Macquarie, Gough, Antipodes Islands), as has been proposed (29).

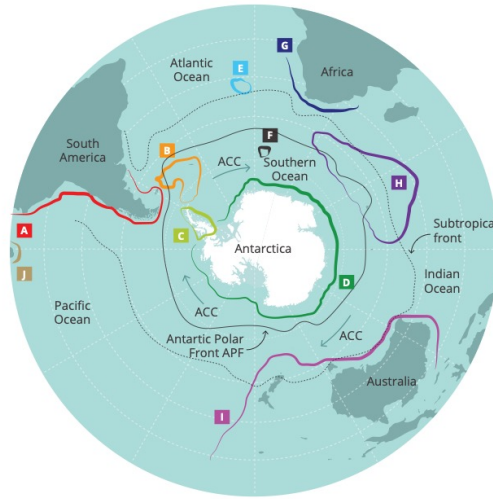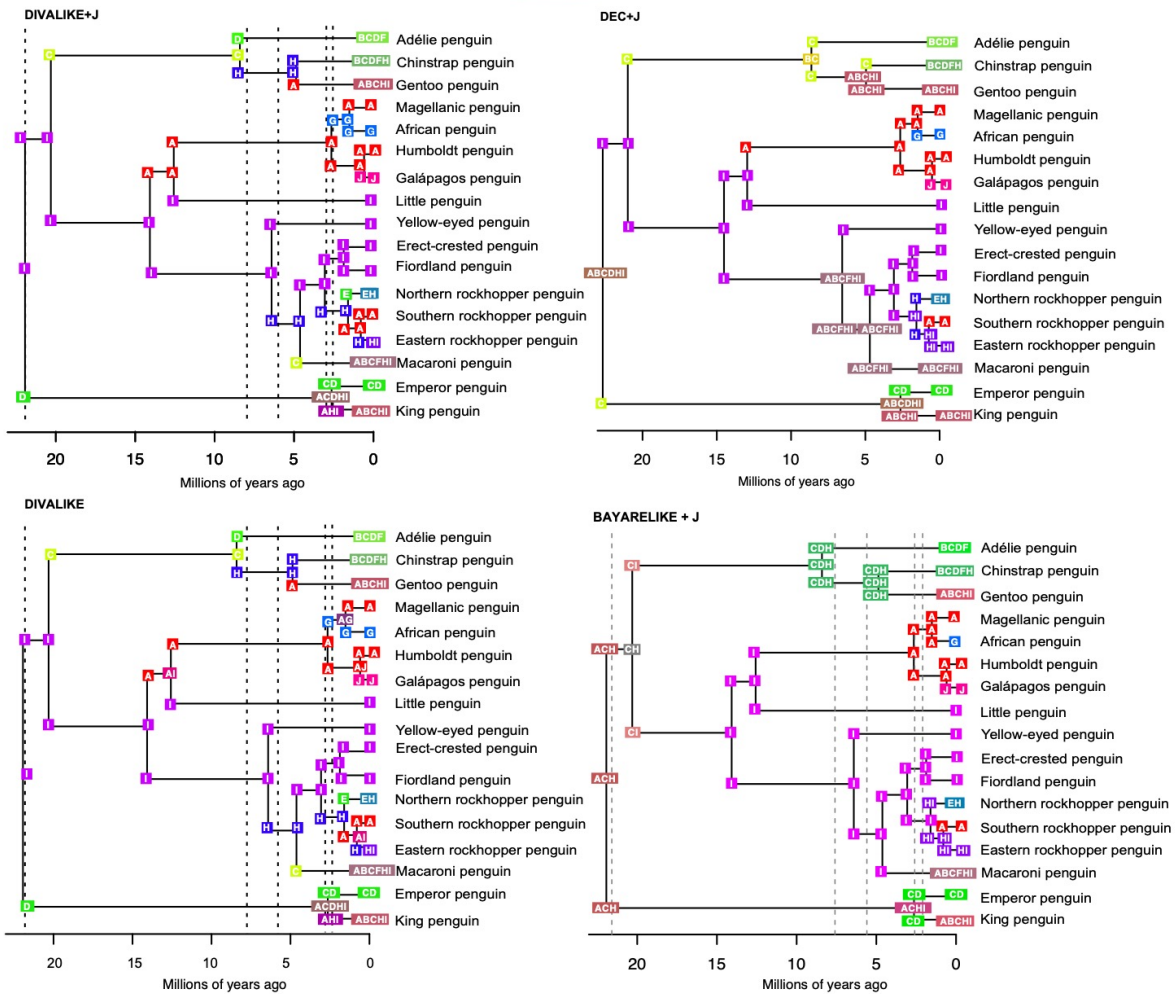

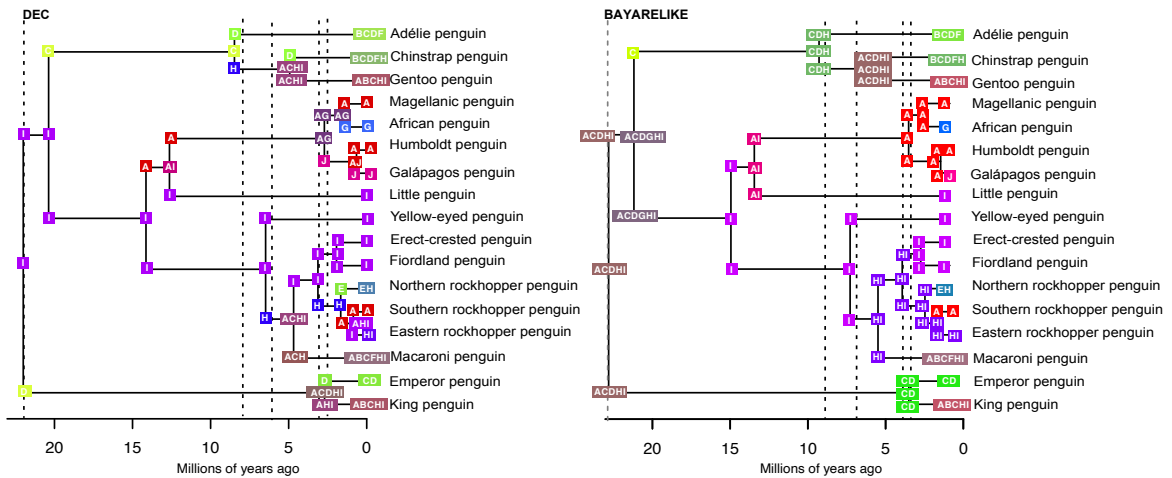

129  
 130 **Fig S11.** Historical biogeographic analysis using BioGeoBEARS. Results of the six models: DIVALIKE,  
 131 DEC, BAYAREALIKE with and without the parameter  $j$ , which attempts to model speciation through a  
 132 founder-event. The letters at the nodes indicate the distribution according to the accompanying map: A-  
 133 South America coast, B-Scotia Arc Islands, C-Antarctic Peninsula, D-Continental Antarctica (except  
 134 Peninsula), E-Gough Island, F-Bouvet Island, G- Southern African coast, H-islands in the Indian Ocean and  
 135 Amsterdam Island, I-New Zealand and Australia region, and J-Galápagos Island. The models are shown  
 136 according to the likelihood, with the best model at the top left (DIVALIKE +  $j$ ; Fig. 1), followed by DEC+ $j$ ,  
 137 DIVALIKE, BAYAREALIKE+ $j$ , DEC, BAYAREALIKE. DIVALIKE and DEC suggest an ancestral distribution  
 138 along the coasts of New Zealand and Australia as suggested by the optimal model (DIVALIKE +  $j$ ; Fig. 1),  
 139 whereas the models DEC+ $J$  and BAYAREALIKE suggest a broad ancestral area that includes New Zealand  
 140 and Australia but also South America, Scotia Arc, Antarctic Peninsula, Antarctica, Indian Ocean and  
 141 Amsterdam Island. The BAYAREALIKE+ $j$  model recovers a very different ancestral area prediction that  
 142 encompasses: South America, the Antarctic Peninsula, and islands in the Indian Ocean and Amsterdam  
 143 Island.

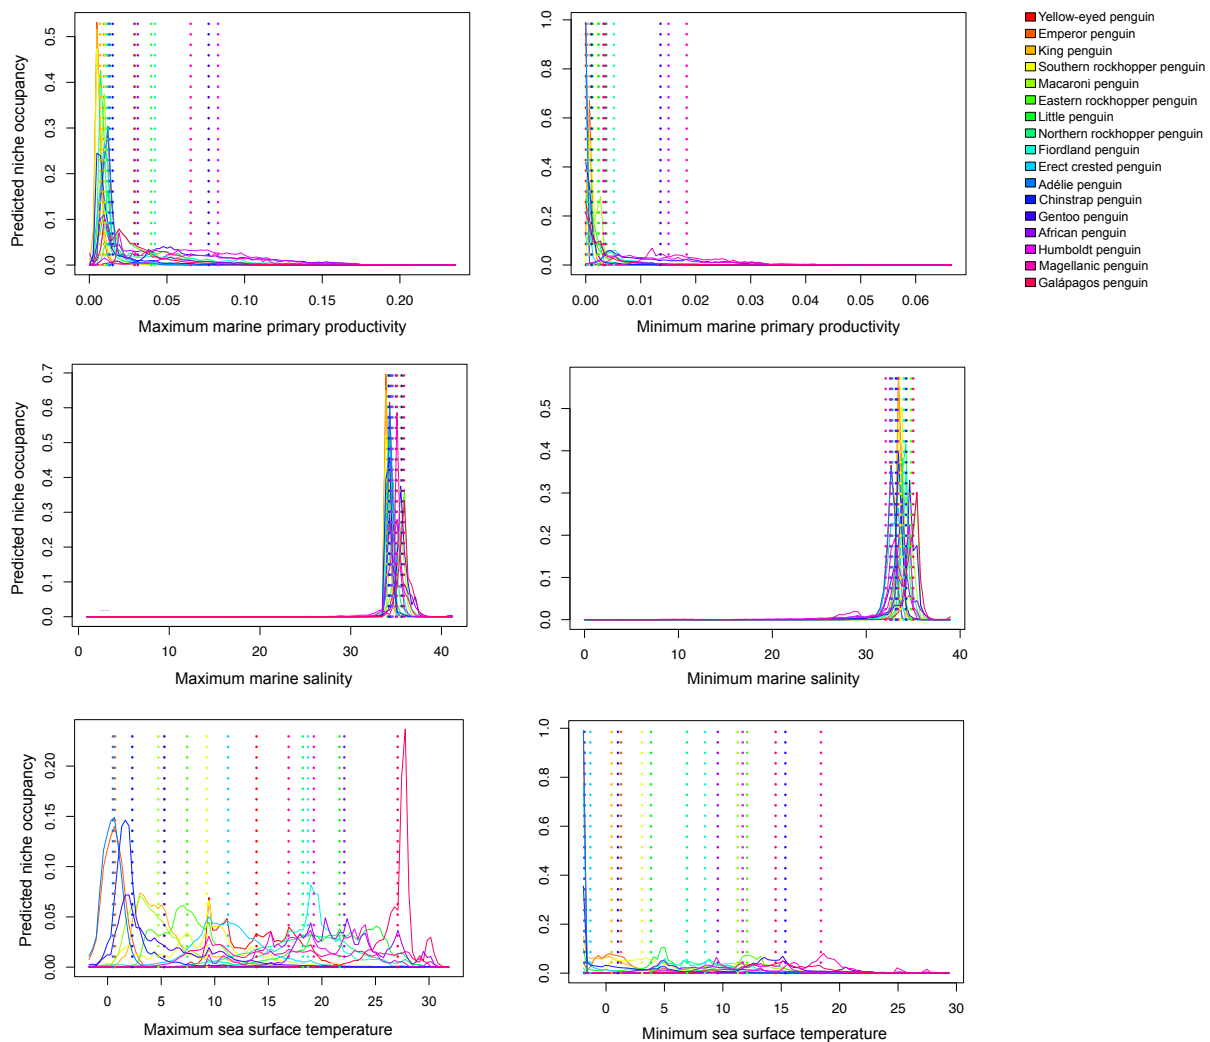

144  
 145 **Fig S12.** Predicted Niche Occupancy (PNO) profiles for 18 penguin species. The x-axes represent the six  
 146 evaluated bioclimatic variables (maximum and minimum marine temperature, maximum and minimum  
 147 salinity, and maximum and minimum primary productivity); the y-axes describe the degree of suitability  
 148 (niche occupancy) for each penguin species. Overlapping peaks in niche occupancy suggest similar  
 149 bioclimatic tolerances, and the breadth of the curve indicates the bioclimatic tolerance specificity. Each  
 150 species is indicated by a different color in the caption. The dashed lines are the average values for each  
 151 species. The plot for Salinity shows greater overlap among penguin species than primary productivity.  
 152 Penguins that occupy areas that experience extreme temperatures (Antarctica and Galápagos) behave as  
 153 stenothermal species, compared to the eurythermal species distributed across an intermediate range of  
 154 min and max temperatures.  
 155

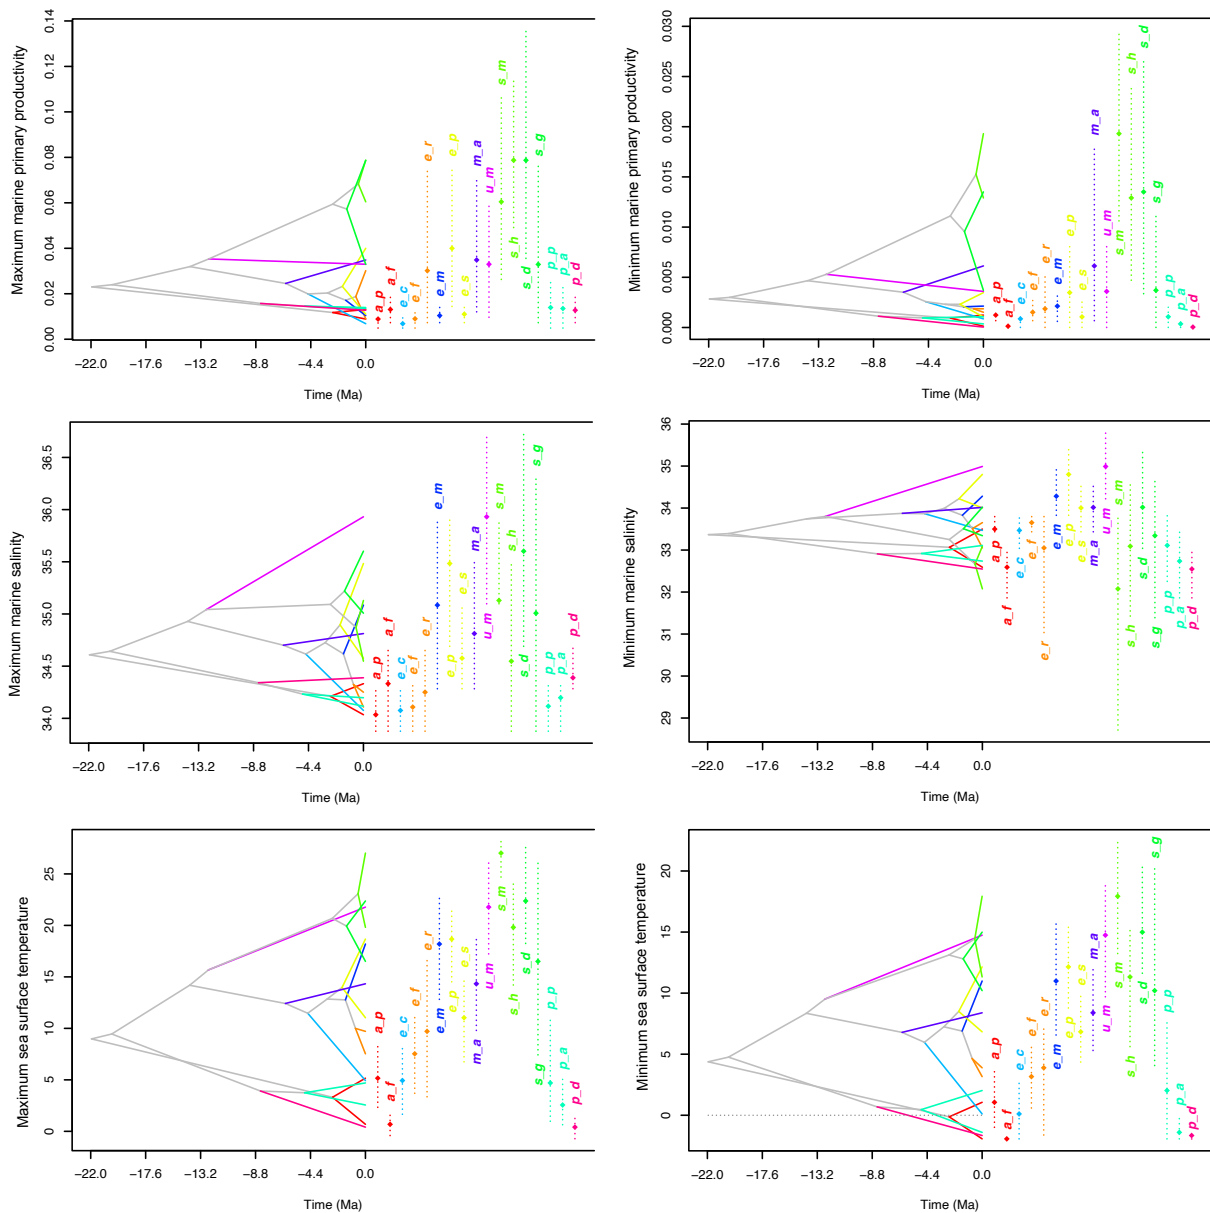

156

157 **Fig S13.** Ecological niche disparity through time (DTT) for 18 penguin species. Our phylogenetic hypothesis  
 158 of penguin relationships (Fig. 1) is projected into niche parameter space represented on the y-axis  
 159 (maximum and minimum temperature, maximum and minimum salinity, and maximum and minimum  
 160 primary productivity) and the mean environmental tolerance of the PNO profiles are reconstructed across  
 161 the internal nodes of the topology. Vertical dashed line for each species of penguin represent the 80%  
 162 central density of environmental tolerance (i.e. confidence interval), and the diamond point of the same  
 163 color represents the mean. Key: king (a\_p), emperor (a\_f), gentoo (p\_p), chinstrap (p\_a), Adélie (p\_d),  
 164 macaroni (e\_c), eastern rockhopper (e\_f), southern rockhopper (e\_r), fiordland (e\_p), erect-crested (e\_s),  
 165 yellow-eyed (m\_a), little (u\_m), Galápagos (s\_m), Humboldt (s\_h), African (s\_d), Magellanic (s\_g)  
 166 penguins. Convergent niche evolution among different penguin species from distinct clades are suggested  
 167 by crossing branches in the topology, whereas similar climatic origins are suggested by internal nodes that  
 168 overlap.

169

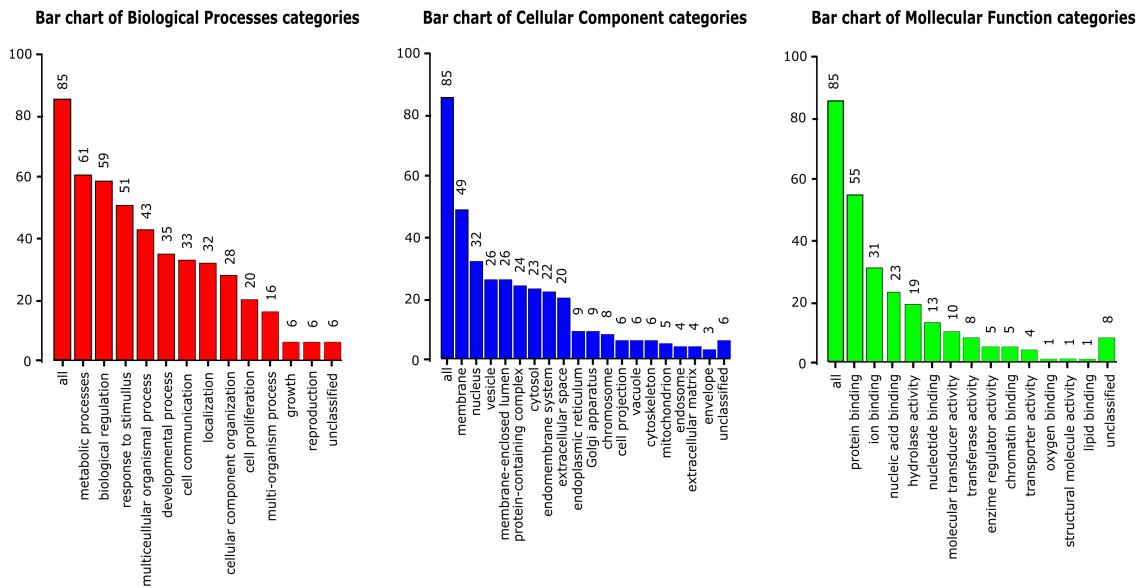

172 **Fig S14.** Classification of genes detected to be under positive selection by functional category. From our  
 173 initial dataset of 104 genes under positive selection, after classification using Gene Ontology a total of 80  
 174 genes were determined to represent: 135 biological processes, 85 cellular components, and 48 protein  
 175 processes. The remaining 24 genes do not show any clear relationship to the categories presently  
 176 represented in gene ontology databases.

A

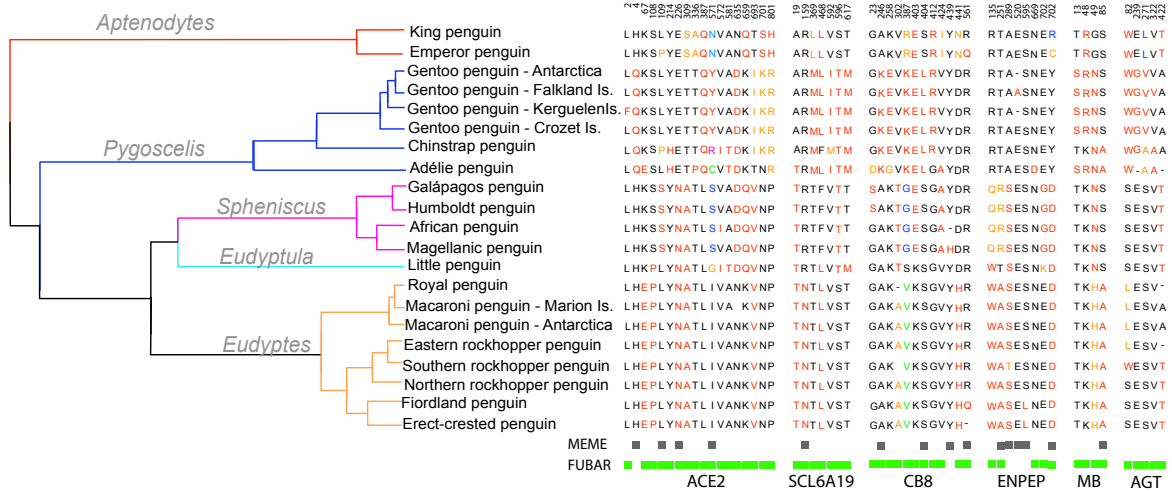

B

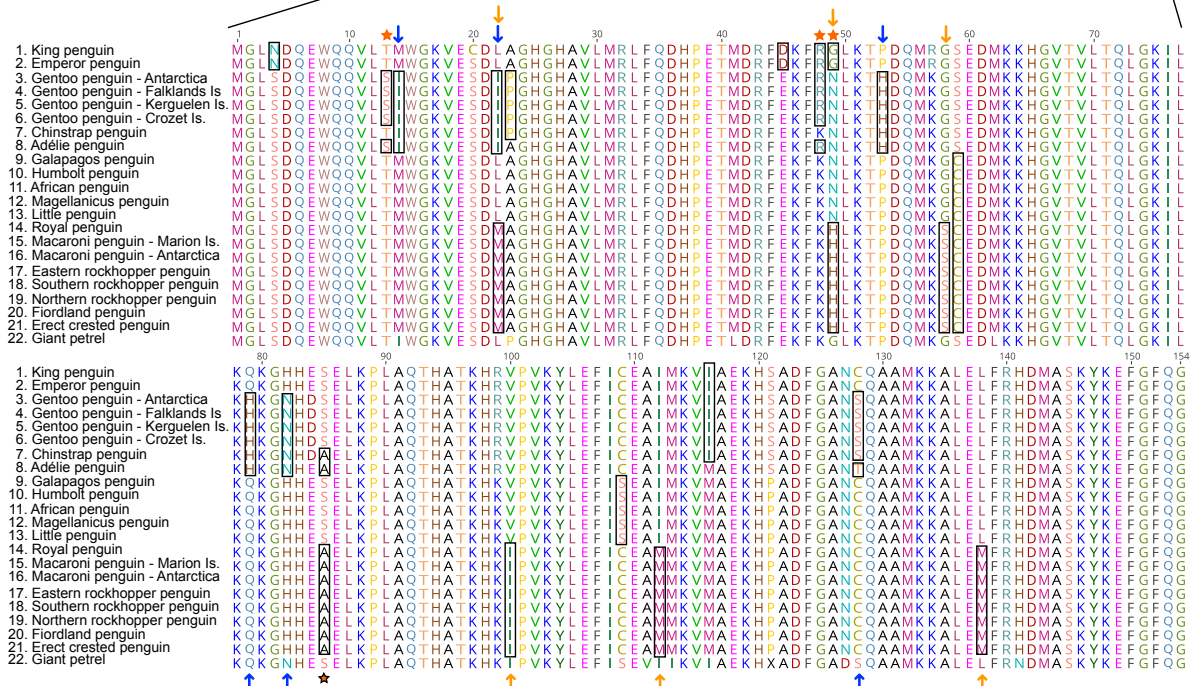

177

178



179 **Fig S15.** Alignment of the positively selected sites and amino acids. A-Results of the six genes (*ACE2*,  
180 *SLC6A19*, *C8B*, *ENPEP*, *MB*, *AGT*) with the lowest p-value for the branch-site results (Table S12) and  
181 belonging to the network cluster related to specific functions (e.g. renal function, circulatory system,  
182 immunity, Figure 3). Positively selected sites were identified by MEME (posterior probability > 0.90) and  
183 FUBAR (p-value ≤ 0.10) for all six genes with the exception of *AGT*, for which sites were identified only by  
184 FUBAR. Sites under selection for MEME and FUBAR respectively were: *ACE2*: 4/17; *SLC6A19*: 1/7; *C8B*:  
185 4/13, *ENPEP*: 5/5, *MB*: 1/4, *AGT*: 0/5. The gene under positive selection with the lowest p-value and  
186 represented in the network is the angiotensin-converting enzyme 2 (*ACE2*) and its function is related to  
187 regulation of cardiovascular and renal function. Such as the genes *SLC6A19*, *ENPEP*, *MB* and *AGT*, the  
188 function of *ACE2* is related to thermoregulation and/or osmoregulation. Recently *ACE2* has been widely  
189 studied since it is used by the SARS-COV2 as a cell receptor to invade human cells (108). However, in  
190 birds the *ACE2* gene shows very low susceptibility to SARS-COV2 (109). Between the six genes, *ACE2*  
191 also showed the higher number of sites under selection (FUBAR: 17 sites and FUBAR and MEME: 3 sites).  
192 Another interesting gene is Myoglobin (*MB*) an essential gene for marine mammals and seabirds (110-  
193 112), as the increase of oxygen storage is necessary to their diving capacities, but it is also a gene involved  
194 in cold adaptation. Shivering and non-shivering thermogenesis promote *MB* production in king penguin  
195 chicks (112-114). For the emperor penguin, *MB* production occurs in chicks and juveniles, but increases in  
196 adults where it appears to be required for exercise/hypoxia of diving activity (115). B- Amino acid alignment  
197 of the CDS of Myoglobin (*MB*) across penguins; polymorphic sites of *MB* are indicated by bars around the  
198 amino acids. Members of *Pygoscelis* (taxon 3 to 8) share 6 non-synonymous sites (blue arrows) for *MB*,  
199 and *Eudyptes* species (taxon 14 to 21) share 6 different non-synonymous sites (orange arrows). These two  
200 genera have significantly different dN/dS ratios relative to each other (Table S13). Positive selected sites  
201 suggested by FUBAR are indicated with an orange star (Ser-Ala; neutral/polar and large to neutral/nonpolar  
202 and small), and the site indicated by both methods is indicated by a black and orange star, which is an  
203 amino acid shared between all *Eudyptes* and Adélie and chinstrap penguins, but differing from all remaining  
204 penguins.

205  
206  
207

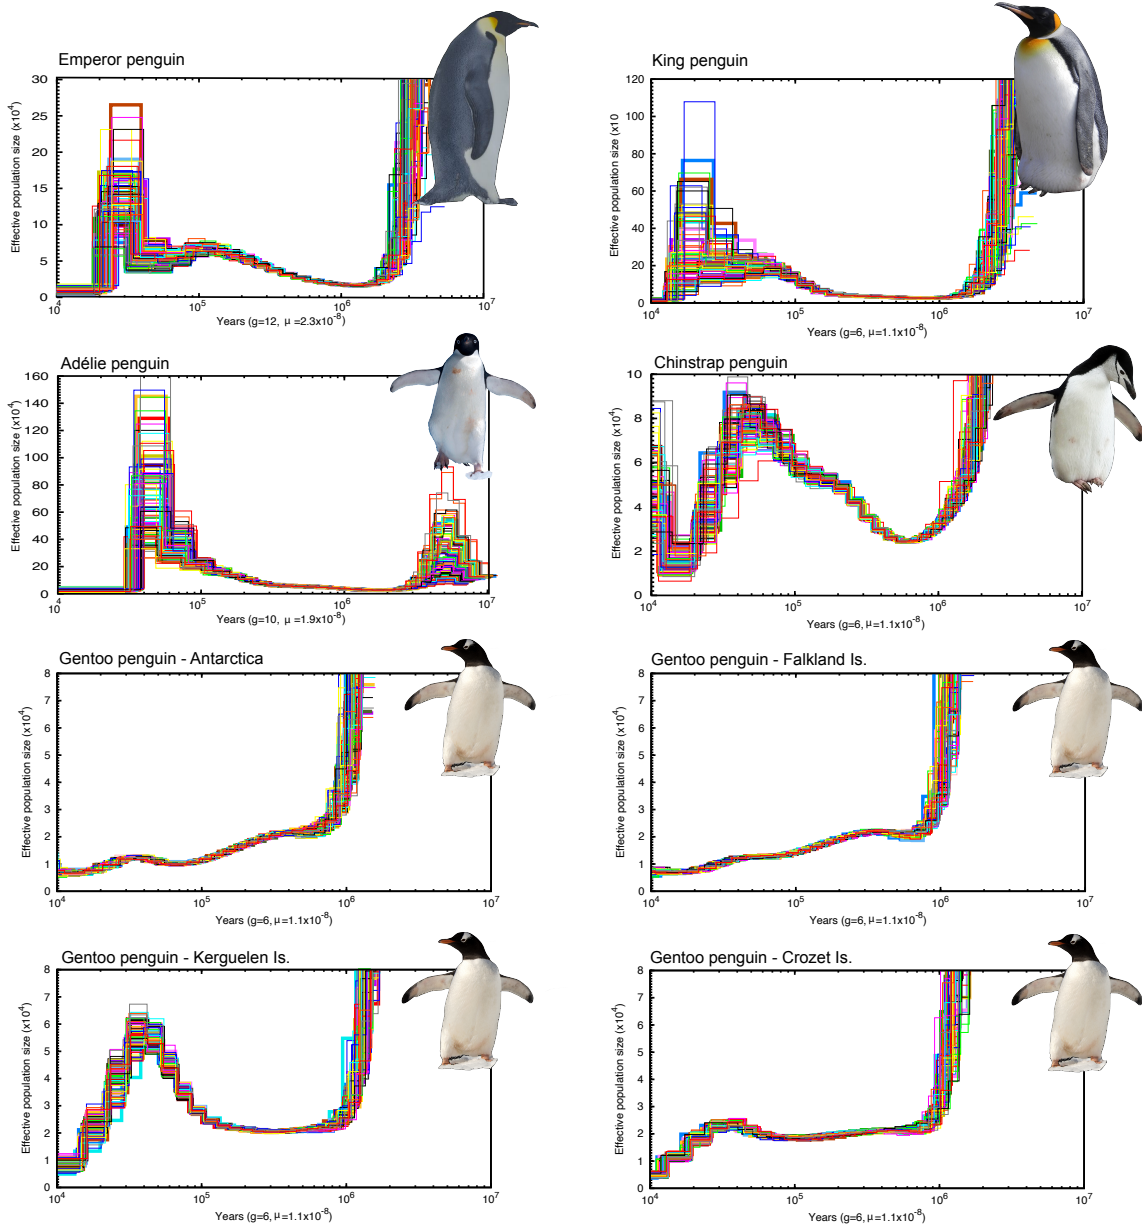

209  
210  
211

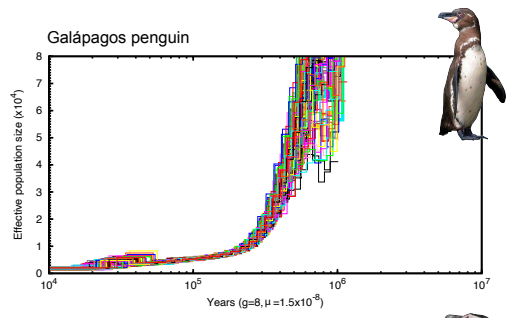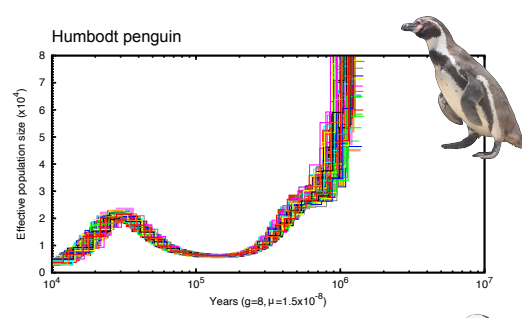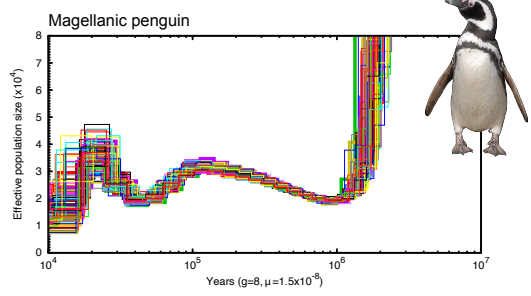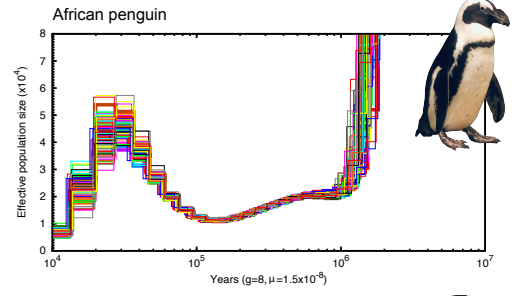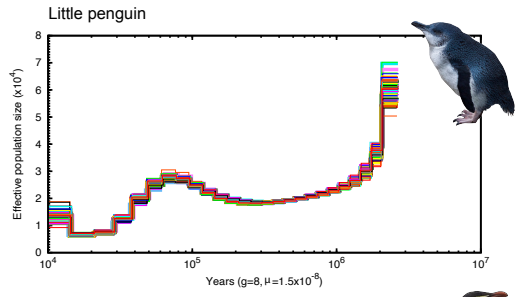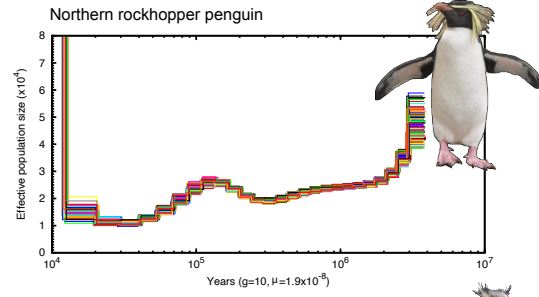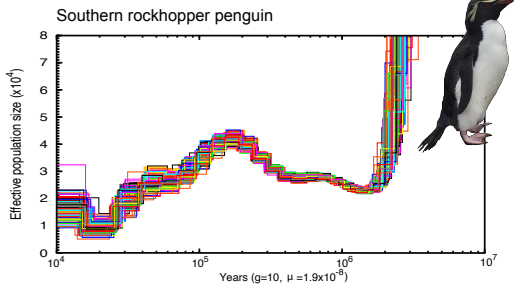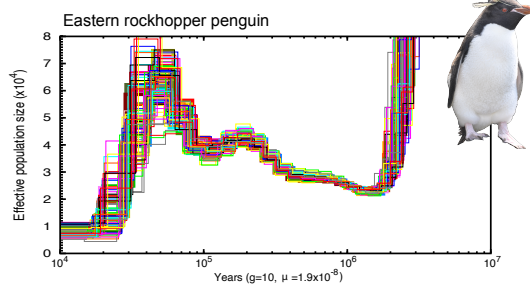

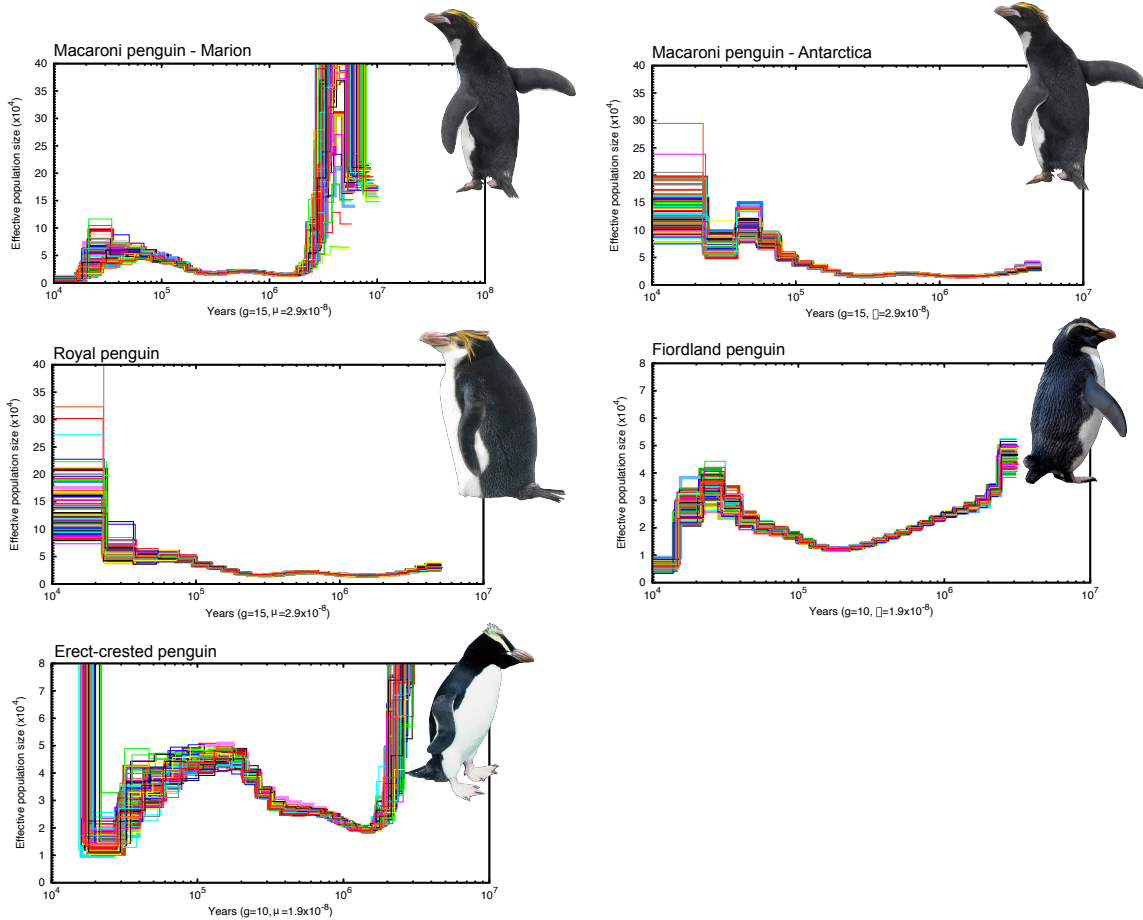

213

214 **Fig S16.** Estimation of Demographic histories using Pairwise Sequentially Markovian Coalescent (PSMC)  
 215 plots for 21 penguin taxa. The yellow-eyed penguin was excluded from these analyses due to the  
 216 fragmented nature of its assembled genome. Confidence in the PSMC plots was evaluated using 100  
 217 bootstrap replicates. Results were consistent across bootstrap replicates, with some variation around the  
 218 magnitude of the increase in  $N_e$  (y-axis) for Adélie, king, and emperor penguins: penguin species are given  
 219 above each panel and generation time ( $g$ ) and mutation rate ( $\mu$ ) used for each penguin taxon are detailed  
 220 below the x-axis (time). Two different responses are observed across the different penguin species with  
 221 some species increasing in  $N_e$  at  $\sim 0.04 - 0.07$  Mya and some not. High levels of introgression detected  
 222 among *Eudyptes* species (Fig. S9) could generate an artifact reflected in their demographic history by  
 223 elevating  $N_e$ , therefore the PSMC plot should be interpreted with caution – there are no current PSMC-like  
 224 methods that account for the influence of introgression. Four divergent lineages of gentoo penguin we  
 225 sequenced, based on the results of Vianna *et al.* (1), and we recovered different demographic histories.  
 226 Similarly, results from Frugone *et al.* (42, 43) suggest that populations of macaroni/royal penguins  
 227 distributed to the north and south of the Antarctic Polar Front are genetically distinct; our PSMC results  
 228 indicate that each of these populations have experienced different demographic histories. These results  
 229 are consistent with knowledge on the extent of ice sheets during glacial periods (116) that suggest that  
 230 each lineage would have been differentially impacted during glacial periods. Other studies have evaluated  
 231 demographic history, frequently over more recent history, using mtDNA (117-121) and SNPs from reduced  
 232 representation sequencing approaches (e.g. RAD-seq; 122-124). Our results recovered a similar shape to  
 233 the PSMC curve for the emperor and Adélie penguins as estimated by a previous study (80). Our data  
 234 suggest that the emperor penguin underwent two periods of population expansion, and during the second  
 235 expansion event reached maximum  $N_e$  more recently than the Adélie penguin. Our estimates of maximum  
 236  $N_e$  for Adélie and emperor penguins are broadly consistent with those estimated by Li *et al.* (80): Adélie -

237  $48 * 10^4$  (bootstrap 23 to  $140 * 10^4$ ) vs.  $60 * 10^4$  (bootstrap 40 to  $80 * 10^4$ ); emperor  $12 * 10^4$  (bootstrap 7 to  
238  $27 * 10^4$ ) vs.  $25 * 10^4$  ( $20-24 * 10^4$ ). Cristofari et al. (122) estimated  $N_e$  for king and emperor penguins over  
239 the past 150,000 years using SNP data, while we evaluated  $N_e$  from 10,000 to 0.5-1 Mya. We omitted the  
240 first 10,000 years as PSMC is known to have high error rates over this period given how the method makes  
241 use of blocks of genome-wide data rather than the site-frequency spectrum to estimate  $N_e$ . Cristofari et al.  
242 (122) recover a decline in  $N_e$  during the LGM for the king penguin and only a single demographic expansion  
243 for emperor penguins at c. 120,000 years – results that differ from the PSMC curves we report. The  
244 difference between Cristofari et al. (122) and our study is likely a consequence of the two studies using  
245 different mutation rates and generation times when estimating the PSMC curves.  
246

247  
248  
249  
250  
251

**Table S1.** Details for all penguin taxa sequenced: common name, latin name, location, latitude and longitude, sample source and NCBI biosample code. The museum/aquarium vouchers numbers are: CAS10091 for African penguin, MVZ149367 for yellow-eyed penguin, AMNH17808 for fiordland penguin, AMNH211990 for erected-crested penguin.

| Species                                 | Common name                 | Location                                       | Latitude | Longitude | Sample Source       | Biosample code |
|-----------------------------------------|-----------------------------|------------------------------------------------|----------|-----------|---------------------|----------------|
| <i>Aptenodytes patagonicus</i>          | King penguin                | Inutil Bay, Chile                              | 53°25' S | 68°19' W  | blood               | SAMN11566628   |
| <i>Aptenodytes forsteri</i>             | Emperor penguin             | Pointe Géologie, Adélie Land, Antarctica       | 66°40' S | 140°01' E | blood               | SAMN11566629   |
| <i>Pygoscelis adeliae</i>               | Adélie penguin              | Lagotellerie, Antarctica                       | 67°53' S | 67°23' W  | blood               | SAMN11566622   |
| <i>Pygoscelis antarcticus</i>           | Chinstrap penguin           | Narebski, Barton Peninsula, Antarctica         | 62°14' S | 58°46' W  | blood               | SAMN11566623   |
| <i>Pygoscelis papua</i>                 | Gentoo penguin              | Antarctica                                     | 64°49' S | 62°51' W  | blood               | SAMN11566624   |
| <i>Pygoscelis papua</i>                 | Gentoo penguin              | Falkland/Malvinas                              | 52°20' S | 59°21' W  | blood               | SAMN11566625   |
| <i>Pygoscelis papua</i>                 | Gentoo penguin              | Kerguelen island                               | 49°16' S | 70°32' E  | blood               | SAMN11566626   |
| <i>Pygoscelis papua</i>                 | Gentoo penguin              | Crozet Island                                  | 46°25' S | 50°24' E  | blood               | SAMN11566627   |
| <i>Spheniscus mendiculus</i>            | Galápagos penguin           | Galápagos islands                              | 0°40' S  | 91°16' W  | blood               | SAMN11566620   |
| <i>Spheniscus humboldti</i>             | Humboldt penguin            | Pan de Azucar, Chile                           | 26°09' S | 70°40' W  | blood               | SAMN11566619   |
| <i>Spheniscus magellanicus</i>          | Magellanic penguin          | Puñihuil, Chiloé, Chile                        | 45°55' S | 74°02' W  | blood               | SAMN11566617   |
| <i>Spheniscus demersus</i>              | African penguin             | Aquarium, California Academy of Science        |          |           | blood               | SAMN11566618   |
| <i>Eudyptula minor</i>                  | penguin                     | Cheyne Island, Western Australia               | 34°35' S | 118°45' E | blood               | SAMN11566621   |
| <i>Megadyptes antipodes</i>             | Yellow-Eyed penguin         | Southern Islands, New Zealand                  | 45°33' S | 170°02' E | skin snip & toe-pad | SAMN11566616   |
| <i>Eudyptes chrysolophus</i>            | Macaroni penguin            | Elephant Island, Antarctica                    | 61°05' S | 55°00' W  | blood               | SAMN11566614   |
| <i>Eudyptes chrysolophus</i>            | Macaroni penguin            | Marion Island                                  | 46°50' S | 37°48' E  | blood               | SAMN11566613   |
| <i>Eudyptes schlegeli</i>               | Royal penguin               | Macquarie Island, Tasmania                     | 54°29' S | 158°56' E | blood               | SAMN11566615   |
| <i>Eudyptes pachyrhynchus</i>           | Fiordland penguin           | Ocean off Albany, Western Australia, Australia | 35°03' S | 117°57' E | blood               | SAMN11566612   |
| <i>Eudyptes sclateri</i>                | Erect-crested penguin       | Bounty Island, New Zealand                     | 47°45' S | 179°02' E | blood               | SAMN11566611   |
| <i>Eudyptes moseleyi</i>                | Northern Rockhopper penguin | Amsterdam Island                               | 37°50' S | 77°31' E  | blood               | SAMN11566608   |
| <i>Eudyptes chrysocome</i>              | Southern rockhopper penguin | Terhalten Island, Chile                        | 55°26' S | 67°03' W  | blood               | SAMN11566610   |
| <i>Eudyptes filholi</i>                 | Eastern rockhopper penguin  | Kerguelen island                               | 49°28' S | 69°57' E  | blood               | SAMN11566609   |
| <i>Macronectes giganteus - outgroup</i> | Giant petrel                | Avian Island, Antarctica                       | 67°45' S | 68°53' W  | blood               | SAMN11566630   |

**Table S2.** Ecological information for extant penguins, including distribution, latitudinal range, body mass, foraging type, mean foraging depth, diet, and generation time used for Pairwise Sequentially Markovian Coalescent (PSMC) analyses based on the average maximum age at sexual maturity according to the authors listed (reference g) multiplied by a factor of two.

| Species                     | Geographic distribution                                                       | Latitude range | Body mass (Kg) |           | Foraging Type | Mean foraging depth | Diet |             |             | Years | Generationtime PSMC                                |
|-----------------------------|-------------------------------------------------------------------------------|----------------|----------------|-----------|---------------|---------------------|------|-------------|-------------|-------|----------------------------------------------------|
|                             |                                                                               |                | Males          | Females   |               |                     | Fish | Cephalopods | Crustaceans |       | Reference time                                     |
| Emperor penguin             | Circum-Antarctica                                                             | 66-77° S       | 21.9-40.0      | 22.1-32.0 | Offshore      | 20-200 m            | ✓✓✓  | ✓           | ✓           | 12    | Mougin and van Beveren 1979                        |
| King penguin                | sub-Antarctica                                                                | 46-54° S       | 9.3-13.8       | 8.4-13.2  | Offshore      | 100-200 m           | ✓    | ✓           | ✓✓✓         | 6     | Garcia-Borboroglu and Boersma 2013                 |
| Adélie penguin              | Circum-Antarctica                                                             | 54-77° S       | 4.2-5.5        | 3.8-4.8   | Offshore      | 3-98 m              | ✓✓   |             | ✓✓✓         | 10    | Ainley et al. 1983                                 |
| Chinstrap penguin           | Antarctica, Scotia Sea region                                                 | 53-65° S       | 3.5-5.1        | 3.2-4.5   | Offshore      | 31-121m             | ✓    |             | ✓✓✓         | 6     | Garcia-Borboroglu and Boersma 2013                 |
| Gentoo penguin              | Antarctica, sub-Antarctica                                                    | 54-65° S       | 5.5-7.7        | 4.9-7.2   | Inshore       | 30-90m              | ✓✓✓  | ✓✓✓         | ✓✓✓         | 6     | Williams 1995                                      |
| Galápagos penguin           | Galápagos                                                                     | 0° S           | 1.9-2.6        | 1.4-2.1   | Inshore       | 6-52 m              | ✓✓✓  | ✓           | ✓           | 8     | Garcia-Borboroglu and Boersma 2013                 |
| Humboldt penguin            | Peru, Chile                                                                   | 11-41° S       | 4.7-5.0        | 4.9-4.1   | Inshore       | < 30m               | ✓✓✓  | ✓✓✓         | ✓✓✓         | 8     | Araya 2000                                         |
| Magellanic penguin          | Argentina, Chile                                                              | 41-55° S       | 4.0-5.2        | 3.2-4.4   | Offshore      | 30-90m              | ✓✓✓  | ✓✓          | ✓✓          | 8     | Garcia-Borboroglu and Boersma 2013                 |
| African penguin             | South Africa                                                                  | 32-34° S       | 3.1-3.6        | 2.7-3.3   | Inshore       | 30-85m              | ✓✓✓  | ✓           |             | 8     | Crawford et al. 1999                               |
| Little penguin              | Australia, New Zealand                                                        | 32-47° S       | 1.0-1.3        | 0.8-1.2   | Either        |                     | ✓✓✓  | ✓✓          | ✓✓          | 8     | Mougin and van Beveren 1979; Perman and Steen 2000 |
| Yellow-Eyed penguin         | New Zealand, Auckland Is.                                                     | 43-52° S       | 3.9-8.9        | 3.6-8.4   | Inshore       | 40-120 m            | ✓✓✓  | ✓✓          | ✓           | 6     | Richdale 1957                                      |
| Fiordland penguin           | New Zealand                                                                   | 43-47° S       | 2.4-3.9        | 2.2-3.1   | Offshore      |                     | ✓    | ✓✓✓         | ✓✓          | 10    | Garcia-Borboroglu and Boersma 2013                 |
| Erect-crested penguin       | Antipodes Is., Bountry Is.                                                    | 47-49° S       | 4.9-5.5        | 4.8-5.4   | Offshore      |                     |      |             |             | 15    | Garcia-Borboroglu and Boersma 2013                 |
| Southern rockhopper penguin | South America, Falkland Is.                                                   | 50-54° S       | 2.0-2.8        | 1.5-2.8   | Either        | 14m                 | ✓✓✓  | ✓✓✓         | ✓✓✓         | 10    | Garcia-Borboroglu and Boersma 2013                 |
| Northern Rockhopper penguin | sub-Antarctica                                                                | 37° S          | 2.6-3.3        | 2.8-3.5   | Offshore      |                     | ✓✓   | ✓           | ✓✓✓         | 10    | Guinard et al. 1998, Simeone et al. Unpublish      |
| Eastern rockhopper penguin  | sub-Antarctica (Indian Ocean Is and Pacific Ocean)                            | 46-54° S       | 2.1-3.2        | 2.0-3.2   | Offshore      | 40m                 | ✓✓✓  | ✓✓✓         | ✓✓✓         | 10    | Garcia-Borboroglu and Boersma 2013                 |
| Macaroni/Royal penguins     | North Antarctic Peninsula, sub-Antarctica (Indian Ocean Is and Pacific Ocean) | 54-61° S       | 3.1-6.6        | 2.8-6.3   | Offshore      | 20-35 m             | ✓✓✓  | ✓           | ✓✓          | 15    | Croxall and Davis, 1999                            |

**Table S3.** Summary of penguin genome sequencing results and assembly quality metrics. The genomes of 22 penguins from 18 species were sequenced (Table S1). We assembled the genomes of all penguins to ~30x coverage using emperor penguin as a reference (66).

| Species                     | Coverage | No. of contigs | Number of contigs in scaffolds | Number of contigs not in scaffolds | Longest contig | No. of contigs > 1000 bp | Total size of contigs | N50 (bp) |
|-----------------------------|----------|----------------|--------------------------------|------------------------------------|----------------|--------------------------|-----------------------|----------|
| Macaroni penguin-Antarctica | 29       | 160,228        | 159,596                        | 632                                | 124,946        | 115,272                  | 1,163,517,104         | 15,603   |
| Macaroni penguin-Marion     | 31       | 141,188        | 140,520                        | 668                                | 130,906        | 105,255                  | 1,167,467,463         | 17,518   |
| Royal penguin               | 34       | 139,221        | 138,529                        | 692                                | 154,947        | 103,813                  | 1,167,662,777         | 17,753   |
| Southern rockhopper penguin | 34       | 145,468        | 144,774                        | 694                                | 147,757        | 105,657                  | 1,168,557,712         | 17,460   |
| Eastern rockhopper penguin  | 35       | 139,802        | 139,114                        | 688                                | 154,723        | 104,511                  | 1,167,742,180         | 17,645   |
| Northern Rockhopper penguin | 29       | 167,064        | 166,589                        | 475                                | 109,281        | 119,787                  | 1,148,990,222         | 14,524   |
| Fiordland penguin           | 26       | 168,080        | 167,602                        | 478                                | 138,629        | 121,119                  | 1,148,260,405         | 14,333   |
| Erect-crested penguin       | 18       | 167,276        | 166,817                        | 459                                | 115,472        | 120,523                  | 1,149,679,527         | 14,458   |
| Yellow-Eyed penguin         | 6        | 2,152,762      | 2,152,688                      | 74                                 | 20,154         | 240,165                  | 1,011,762,526         | 749      |
| Little penguin              | 28       | 169,972        | 169,503                        | 469                                | 133,945        | 121,901                  | 1,147,664,646         | 14,220   |
| African penguin             | 26       | 169,351        | 168,896                        | 455                                | 133,931        | 121,828                  | 1,148,419,732         | 14,220   |
| Humboldt penguin            | 26       | 163,183        | 162,727                        | 456                                | 129,040        | 119,504                  | 1,149,336,756         | 14,582   |
| Magellanic penguin          | 31       | 157,810        | 157,326                        | 484                                | 133,949        | 116,894                  | 1,150,338,177         | 14,979   |
| Galápagos penguin           | 31       | 171,436        | 170,980                        | 456                                | 110,226        | 123,722                  | 1,147,203,018         | 13,916   |
| Adélie penguin              | 30       | 173,296        | 172,858                        | 438                                | 110,227        | 122,170                  | 1,144,972,554         | 14,117   |
| Chinstrap penguin           | 67       | 155,353        | 154,862                        | 491                                | 114,170        | 113,214                  | 1,150,431,292         | 15,547   |
| Gentoo penguin-Crozet I.    | 30       | 158,326        | 157,848                        | 478                                | 110,226        | 117,882                  | 1,149,081,850         | 14,811   |
| Gentoo penguin-Kerguelen I. | 32       | 159,641        | 159,164                        | 477                                | 110,234        | 118,344                  | 1,148,959,576         | 14,743   |
| Gentoo penguin-Falkland I.  | 30       | 160,673        | 160,203                        | 470                                | 136,813        | 118,594                  | 1,149,024,085         | 14,696   |
| Gentoo penguin-Antarctica   | 29       | 160,551        | 160,078                        | 473                                | 110,222        | 118,431                  | 1,149,169,261         | 14,737   |
| King penguin                | 32       | 120,609        | 119,815                        | 794                                | 162,643        | 94,268                   | 1,173,234,245         | 20,065   |
| Emperor penguin             | 25       | 134,943        | 134,351                        | 592                                | 138,667        | 105,539                  | 1,156,469,197         | 17,049   |
| Giant Petrel                | 23       | 373,028        | 372,834                        | 194                                | 77,036         | 201,876                  | 1,115,383,760         | 7,295    |



**Table S4.** Results of benchmarking genome quality using the Universal Single-Copy Orthologs (BUSCO) dataset. Percentage of complete (C), fragmented (F), and missing (M) vertebrate single-copy orthologs are detailed. Genome sequences had high completeness scores (over 90%, with the exception of the yellow-eyed penguin (63.7%) sequenced from a skin-snip taken from a museum specimen).

| Species                     | Location                     | % C  | % S  | % D | % F  | % M  | Complete BUSCOs (C) | Complete and single-copy BUSCOs (S) | Complete and duplicated BUSCOs (D) | Fragmented BUSCOs (F) | Missing BUSCOs (M) | Total BUSCO searched |
|-----------------------------|------------------------------|------|------|-----|------|------|---------------------|-------------------------------------|------------------------------------|-----------------------|--------------------|----------------------|
| Emperor penguin             | Adélie Land, Antarctica      | 92.9 | 92   | 0.9 | 4.7  | 2.4  | 4564                | 4520                                | 44                                 | 231                   | 120                | 4915                 |
| King penguin                | Inutil Bay, Chile            | 93.1 | 92.6 | 0.9 | 4.2  | 2.6  | 4595                | 4551                                | 44                                 | 204                   | 116                | 4915                 |
| Adélie penguin              | Lagotellerie, Antarctica     | 90   | 89.1 | 0.9 | 6.7  | 3.3  | 4424                | 4380                                | 44                                 | 328                   | 163                | 4915                 |
| Chinstrap penguin           | Narebski, Antarctica         | 92.8 | 91.9 | 0.9 | 4.6  | 2.6  | 4563                | 4517                                | 46                                 | 226                   | 126                | 4915                 |
| Gentoo penguin              | Crozet                       | 93   | 92   | 1   | 4.2  | 2.8  | 4574                | 4524                                | 50                                 | 208                   | 133                | 4915                 |
| Gentoo penguin              | Kerguelen Island             | 93   | 92.1 | 0.9 | 4.4  | 2.6  | 4572                | 4528                                | 44                                 | 217                   | 126                | 4915                 |
| Gentoo penguin              | Antarctica                   | 93   | 92.1 | 0.9 | 4.5  | 2.5  | 4568                | 4525                                | 43                                 | 222                   | 125                | 4915                 |
| Gentoo penguin              | Falkland/Malvinas Island     | 93.2 | 92.2 | 1   | 4.3  | 2.5  | 4582                | 4533                                | 49                                 | 211                   | 122                | 4915                 |
| African penguin             | Aquarium Calacademy          | 93.1 | 92.2 | 0.9 | 4.4  | 2.5  | 4577                | 4534                                | 43                                 | 218                   | 120                | 4915                 |
| Humboldt penguin            | Pan de Azucar, Chile         | 93.2 | 92.3 | 0.9 | 4,5  | 2,3  | 4585                | 4539                                | 46                                 | 219                   | 111                | 4915                 |
| Magellanic penguin          | Puñihuil, Chiloe             | 93.1 | 92.2 | 0.9 | 4.3  | 2.6  | 4578                | 4533                                | 45                                 | 211                   | 126                | 4915                 |
| Galápagos penguin           | Galápagos Island             | 93.4 | 92,5 | 0.9 | 4.4  | 2.2  | 4587                | 4545                                | 42                                 | 214                   | 114                | 4915                 |
| Little penguin              | Cheyne Island, Australia     | 93.3 | 92.4 | 0.9 | 4.5  | 2.2  | 4583                | 4541                                | 42                                 | 221                   | 111                | 4915                 |
| Yellow-Eyed penguin         | Southern Island, New Zealand | 63.7 | 63.4 | 0.3 | 12,8 | 23,5 | 3132                | 3117                                | 15                                 | 631                   | 1152               | 4915                 |
| Southern rockhopper penguin | Terhalten Island             | 93.8 | 92.9 | 0.9 | 3.9  | 2.3  | 4612                | 4567                                | 45                                 | 192                   | 111                | 4915                 |
| Macaroni penguin            | Elephant island, Antarctica  | 93.4 | 92,5 | 0.9 | 4.5  | 2.1  | 4589                | 4544                                | 45                                 | 219                   | 107                | 4915                 |
| Macaroni penguin            | Marion Island                | 93.8 | 92.9 | 0.9 | 4    | 2.2  | 4612                | 4566                                | 46                                 | 195                   | 108                | 4915                 |
| Eastern rockhopper penguin  | Kerguelen Island             | 93.8 | 92.9 | 0.9 | 3.9  | 2.3  | 4607                | 4564                                | 43                                 | 191                   | 117                | 4915                 |
| Northern Rockhopper penguin | Amsterdam Island             | 93.1 | 92.2 | 0.9 | 4.3  | 2.6  | 4578                | 4533                                | 45                                 | 210                   | 127                | 4915                 |
| Fiordland penguin           | Western Australia            | 93.4 | 92.6 | 0.8 | 4.4  | 2.2  | 4589                | 4550                                | 39                                 | 216                   | 110                | 4915                 |
| Royal penguin               | Macquarie Island             | 94   | 93.2 | 0.8 | 4    | 2    | 4622                | 4582                                | 40                                 | 196                   | 97                 | 4915                 |
| Erect-crested penguin       | Bounty Island, New Zealand   | 92.6 | 91.7 | 0.9 | 4.8  | 2.6  | 4553                | 4509                                | 44                                 | 238                   | 124                | 4915                 |

**Table S5.** The total number of introns, CDS, and UCE loci identified for each penguin genome and the outgroup, with an average of 13,460 introns, 16,039 CDS and 4,817 UCEs.

| <b>Species</b>              | <b>Location</b>              | <b>Intron</b> | <b>CDS</b> | <b>UCE</b> |
|-----------------------------|------------------------------|---------------|------------|------------|
| Emperor penguin             | Adélie Land, Antarctica      | 13504         | 16033      | 4823       |
| King penguin                | Inutil Bay, Chile            | 13513         | 16054      | 4806       |
| Adélie penguin              | Lagotellerie, Antarctica     | 13502         | 16023      | 4819       |
| Chinstrap penguin           | Narebski, Antarctica         | 13504         | 16030      | 4817       |
| Gentoo penguin              | Crozet                       | 13503         | 16030      | 4828       |
| Gentoo penguin              | Kerguelen Island             | 13504         | 16034      | 4823       |
| Gentoo penguin              | Antarctica                   | 13503         | 16031      | 4822       |
| Gentoo penguin              | Falkland/Malvinas Island     | 13505         | 16034      | 4826       |
| African penguin             | Aquarium Cal. Acad. Sci.     | 13501         | 16027      | 4818       |
| Humboldt penguin            | Pan de Azucar, Chile         | 13503         | 16030      | 4820       |
| Magellanic penguin          | Puñihuil, Chiloe             | 13503         | 16034      | 4823       |
| Galápagos penguin           | Galápagos Island             | 13503         | 16028      | 4821       |
| Little penguin              | Cheyne Island, Australia     | 13505         | 16032      | 4957       |
| Yellow-Eyed penguin         | Southern Island, New Zealand | 12453         | 16059      | 4503       |
| Southern rockhopper penguin | Terhalten Island             | 13513         | 16065      | 4804       |
| Macaroni penguin            | Elephant island, Antarctica  | 13511         | 16048      | 4845       |
| Macaroni penguin            | Marion Island                | 13513         | 16058      | 4809       |
| Eastern rockhopper penguin  | Kerguelen Island             | 13514         | 16060      | 4809       |
| Northern Rockhopper penguin | Amsterdam Island             | 13505         | 16034      | 4863       |
| Fiordland penguin           | Western Australia            | 13504         | 16033      | 4861       |
| Royal penguin               | Macquarie Island             | 13514         | 16060      | 4849       |
| Erect-crested penguin       | Bounty Island, New Zealand   | 13506         | 16036      | 4825       |
| Giant petrel                | Avian Island, Antarctica     | 13504         | 16033      | 4836       |

**Table S6.** Summary of loci used for phylogenetic analyses: the total length of the alignment (bp), the number of loci, and the average length of each locus for CDS, Intron and UCE loci, respectively (loci with extensive missing data omitted – see Table S5 for unfiltered loci). For the intron loci, each intron locus is comprised of all introns in a gene concatenated together as they are not independent of each other.

| <b>All taxa</b>                     | <b>CDS</b> | <b>Intron</b> | <b>UCE</b> |
|-------------------------------------|------------|---------------|------------|
| total length of alignment (bp)      | 6999894    | 63106707      | 2929733    |
| number of loci                      | 4668       | 2610          | 1825       |
| average length of each locus (bp)   | 1499.5     | 24178.8       | 1605.3     |
| <b>Omitting yellow-eyed penguin</b> |            |               |            |
| total length of alignment (bp)      | 17461296   | 202550995     | 6491478    |
| number of loci                      | 11011      | 8040          | 4057       |
| average length of each loci (bp)    | 1585.8     | 25192.9       | 1600.1     |

**Table S7.** Results of the D-FOIL test for a total of eight different combinations of 5-taxon statements. The p-values for the four D-FOIL components, DFO, DIL, DFI, DOL (F:First, O:Outer, I:Inner, L>Last) are detailed.

| Dataset | Combination                                                                             | DFO (p-value)  | DIL (p-value)  | DFI (p-value)  | DOL (p-value)  |
|---------|-----------------------------------------------------------------------------------------|----------------|----------------|----------------|----------------|
| 1       | Eastern rockhopper, northern rockhopper, fiordland, yellow-eyed penguin                 | -0.202 (0.140) | -0.199 (0.142) | 0.152 (0.211)  | 0.156 (0.207)  |
| 2       | Southern rockhopper, northern rockhopper, fiordland, erect-crested, yellow-eyed penguin | -0.203 (0.139) | -0.199 (0.141) | 0.119 (0.230)  | 0.123 (0.227)  |
| 3       | Eastern rockhopper, southern rockhopper, fiordland, erect-crested, yellow-eyed penguin  | -0.206 (0.138) | -0.207 (0.139) | 0.064 (0.290)  | 0.062 (0.288)  |
| 4       | Royal, macaroni, eastern rockhopper, northern rockhopper, yellow-eyed penguin           | 0.150 (0.207)  | 0.150 (0.206)  | -0.027 (0.343) | -0.028 (0.345) |
| 5       | Royal, macaroni, eastern rockhopper, southern rockhopper, yellow-eyed penguin           | 0.053 (0.298)  | 0.053 (0.296)  | -0.027 (0.344) | -0.027 (0.344) |
| 6       | Royal, macaroni, fiordland, erect-crested, yellow-eyed penguin                          | -0.207 (0.134) | -0.207 (0.135) | -0.030 (0.353) | -0.030 (0.352) |
| 7       | Gentoo-Antarctica, gentoo-Falkland, gentoo-Kerguelen, gentoo-Crozet, chinstrap penguin  | 0.396 (0.139)  | 0.375 (0.143)  | -0.016 (0.245) | -0.040 (0.263) |
| 8       | Galápagos, Humboldt, African, Magellanic, little penguin                                | 0.198 (0.235)  | -0.199 (0.235) | -0.237 (0.254) | -0.273 (0.253) |

**Table S8.** Details of the five fossil taxa used to calibrate divergence time across crown-group penguins, including the date and age interval (Mya) of the fossils, and the node (Mya) at which the calibration point was applied.

| <b>Node</b>                              | <b>Age interval (Mya)</b> | <b>Fossil calibration taxa</b> |
|------------------------------------------|---------------------------|--------------------------------|
| Sphenisciformes/Procellariiformes (root) | 60.5 – 72.1               | <i>Waimanu manningi</i>        |
| Spheniscidae                             | 9.7 – 25.2                | <i>Madrynornis mirandus</i>    |
| <i>Pygoscelis</i>                        | 6.3 – 25.2                | <i>Pygoscelis calderensis</i>  |
| <i>Spheniscus/Eudyptula</i>              | 9.2 – 23.03               | <i>Spheniscus muizoni</i>      |
| <i>Eudyptes/Megadyptes</i>               | 3.06 – 25.2               | <i>Eudyptes sp.</i>            |

**Table S9.** Models tested using BioGeoBEARS with summary statistics: LnL indicates the log-likelihood of the model given our data; numparams indicates the number of parameters in the analyses; columns d, e and j indicate the likelihood of their respective parameters; AICc indicates the corrected Akaike information criterion, and AICc\_wt the weighted AICc of the tested models. DIVALIKE+J was the model selected and is indicated by an asterisk.

| <b>Model</b>  | <b>LnL</b> | <b>numparams</b> | <b>d</b> | <b>e</b> | <b>j</b> | <b>AICc</b> | <b>AICc_wt</b> |
|---------------|------------|------------------|----------|----------|----------|-------------|----------------|
| DEC           | -78.47     | 2                | 0.026    | 0.017    | 0        | 161.8       | 0.072          |
| DEC+J         | -75.68     | 3                | 0.015    | 0.0009   | 0.093    | 159.2       | 0.26           |
| DIVALIKE      | -77.26     | 2                | 0.027    | 0.010    | 0        | 159.4       | 0.24           |
| DIVALIKE+J*   | -75.23     | 3                | 0.022    | 5.5e-08  | 0.058    | 158.3       | 0.41           |
| BAYAREALIKE   | -88.1      | 2                | 0.031    | 0.12     | 0        | 181.1       | 4.7e-06        |
| BAYAREALIKE+J | -78.44     | 3                | 0.020    | 0.034    | 0.12     | 164.7       | 0.016          |

**Table S10.** Number of coding sequence regions available for each species after filtering for premature stop codons. We used 4,562 CDS loci in our selection analyses (see methods) that overlapped all species in our dataset and for which a start and stop codon were present at the beginning and end of the CDS, respectively.

| <b>Species</b>              | <b>Location</b>             | <b>CDS</b> | <b>Average Sequence Length</b> |
|-----------------------------|-----------------------------|------------|--------------------------------|
| Emperor penguin             | Adélie Land, Antarctica     | 5470       | 1592.64                        |
| King penguin                | Inutil Bay, Chile           | 5403       | 1615.64                        |
| Adélie penguin              | Lagotellerie, Antarctica    | 5372       | 1609.52                        |
| Chinstrap penguin           | Narebski, Antarctica        | 5404       | 1613.58                        |
| Gentoo penguin              | Crozet                      | 5443       | 1607.57                        |
| Gentoo penguin              | Kerguelen Island            | 5440       | 1607.58                        |
| Gentoo penguin              | Antarctica                  | 5446       | 1607.57                        |
| Gentoo penguin              | Falkland/Malvinas Island    | 5442       | 1607.57                        |
| African penguin             | Aquarium Calacademy         | 5400       | 1597.58                        |
| Humboldt penguin            | Pan de Azucar, Chile        | 5404       | 1601.59                        |
| Magellanic penguin          | Puñihuil, Chiloe            | 5424       | 1614.61                        |
| Galápagos penguin           | Galápagos Island            | 5391       | 1612.60                        |
| Little penguin              | Cheyne Island, Australia    | 5410       | 1606.54                        |
| Southern rockhopper penguin | Terhalten Island            | 5454       | 1610.64                        |
| Macaroni penguin            | Elephant island, Antarctica | 5362       | 1613.57                        |
| Macaroni penguin            | Marion Island               | 5447       | 1613.63                        |
| Eastern rockhopper penguin  | Kerguelen Island            | 5458       | 1611.64                        |
| Northern Rockhopper penguin | Amsterdam Island            | 5451       | 1608.60                        |
| Fiordland penguin           | Western Australia           | 5430       | 1597.58                        |
| Royal penguin               | Macquarie Island            | 5446       | 1610.64                        |
| Erect-crested penguin       | Bounty Island, New Zealand  | 5448       | 1598.39                        |
| Giant petrel                | Avian Island, Antarctica    | 5387       | 1591.37                        |

**Table S11.** List of enriched gene sets: Gene ontology analyses for the positively selected genes.

| <b>Enriched gene set</b>                                                     | <b>N</b> | <b>FDR</b> |
|------------------------------------------------------------------------------|----------|------------|
| Angiotensin maturation                                                       | 3        | 0.034638   |
| Regulation of angiotensin levels in blood                                    | 3        | 0.036825   |
| Regulation of systemic arterial blood pressure mediated by a chemical signal | 4        | 0.055572   |
| Positive regulation of reactive oxygen species metabolic process             | 5        | 0.055572   |
| Double-strand break repair                                                   | 7        | 0.055572   |
| Regulation of innate immune response                                         | 9        | 0.055572   |
| Regulation of defense response                                               | 14       | 0.015593   |
| Regulation of response to stress                                             | 20       | 0.015593   |



**Table S12.** Branch-site results for selection across the sampled penguin species. Candidate genes under positive selection, p-values for the gene (significance threshold:  $\alpha < 0.05$ ) and gene description based on Gene Ontology and GeneCards. Genes are ordered based on the p-values recovered. The 46 genes present in the network (Fig. 3) which show two or more connections in function are indicated by an asterisk.

| Contig       | p-value | q-value | Gene name           | Description of the gene or encoded protein (from geneCards)                                                                                                                                                                                                                                           |
|--------------|---------|---------|---------------------|-------------------------------------------------------------------------------------------------------------------------------------------------------------------------------------------------------------------------------------------------------------------------------------------------------|
| Contig001918 | 0       | 0       | <i>CD8A</i>         | CD8 antigen mediates efficient cell-cell interactions in the immune system                                                                                                                                                                                                                            |
| Contig007559 | 0       | 0       | <i>ACE2*</i>        | Family of dipeptidyl carboxydipeptidases, regulation of cardiovascular and renal function                                                                                                                                                                                                             |
| Contig007985 | 0       | 0       | <i>GUCY2C</i>       | Transmembrane protein that functions as a receptor for endogenous peptides guanylin and uroguanylin                                                                                                                                                                                                   |
| Contig007990 | 0       | 0       | <i>EMP1*</i>        | Epithelial Membrane Protein                                                                                                                                                                                                                                                                           |
| Contig008215 | 0       | 0       | <i>RNASEL*</i>      | Component in the interferon-regulated 2-5A system that functions in the antiviral and antiproliferative roles of interferons                                                                                                                                                                          |
| Contig009143 | 0       | 0       | <i>LOC103913744</i> |                                                                                                                                                                                                                                                                                                       |
| Contig009200 | 0       | 0       | <i>SMPD3</i>        | Catalyzes ceramide formation. Ceramide mediates numerous cellular functions, such as apoptosis and growth arrest                                                                                                                                                                                      |
| Contig010445 | 0       | 0       | <i>HELZ2*</i>       | Nuclear transcriptional co-activator for peroxisome proliferator activated receptor alpha. The encoded protein contains a zinc finger and is a helicase that appears to be part of the peroxisome proliferator activated receptor alpha interacting complex.                                          |
| Contig010969 | 0       | 0       | <i>TICAM1</i>       | Is involved immunity against pathogens                                                                                                                                                                                                                                                                |
| Contig013409 | 0       | 0       | <i>KIAA1211</i>     | B(0) transmembrane protein                                                                                                                                                                                                                                                                            |
| Contig014755 | 0       | 0       | <i>LOC103919005</i> |                                                                                                                                                                                                                                                                                                       |
| Contig000718 | 1,E-06  | 2,E-04  | <i>SLC6A19*</i>     | the protein associated to this gene transports certain amino acids into cells. B <sup>0</sup> AT1 is found primarily in the membrane of intestinal cells and are associated to nutrients absorption from food. In the kidneys, B <sup>0</sup> AT1 reabsorbs neutral amino acids into the bloodstream. |
| Contig008076 | 1,E-06  | 2,E-04  | <i>FOXM1*</i>       | The protein encoded by this gene is a transcriptional activator involved in cell proliferation.                                                                                                                                                                                                       |
| Contig015452 | 1,E-06  | 2,E-04  | <i>RFTN1</i>        | Involved in protein trafficking via association with clathrin and AP2 complex                                                                                                                                                                                                                         |
| Contig001071 | 2,E-06  | 3,E-04  | <i>C8B*</i>         | Codes one of the three subunits of the complement component 8 (C8) protein. C8 is one component of the membrane attack complex, which mediates cell lysis, and it initiates membrane penetration of the complex.                                                                                      |
| Contig003547 | 2,E-06  | 3,E-04  | <i>PPP1R3A</i>      | Act as a glycogen-targeting subunit for PP1. PP1 is involved in cell division, regulation of glycogen metabolism, muscle contractility and protein synthesis.                                                                                                                                         |
| Contig006407 | 2,E-06  | 3,E-04  | <i>MYO15B</i>       | Encode a sodium-activated potassium channel subunit                                                                                                                                                                                                                                                   |
| Contig013786 | 2,E-06  | 3,E-04  | <i>KCNT1</i>        | This gene encodes a sodium-activated potassium channel subunit which is thought to function in ion conductance and developmental signaling pathways.                                                                                                                                                  |
| Contig015700 | 2,E-06  | 3,E-04  | <i>ENPEP*</i>       | Among its related pathways are Agents Acting on the Renin-Angiotensin System Pathway, Pharmacodynamics and Peptide hormone metabolism.                                                                                                                                                                |
| Contig006608 | 4,E-06  | 6,E-04  | <i>CALCOCO2</i>     | Xenophagy-specific receptor required for autophagy-mediated intracellular bacteria degradation.                                                                                                                                                                                                       |
| Contig008677 | 7,E-06  | 1,E-03  | <i>ABCC10</i>       | The protein encoded by this gene is a member of the superfamily of ATP-binding cassette (ABC) transporters. ABC proteins transport various molecules across extra- and intra-cellular membranes.                                                                                                      |
| Contig007859 | 9,E-06  | 1,E-03  | <i>MB*</i>          | The encoded protein is a haemoprotein contributing to intracellular oxygen storage and transcellular facilitated diffusion of oxygen                                                                                                                                                                  |
| Contig015042 | 1,E-05  | 2,E-03  | <i>CORO2B</i>       | May play a role in the reorganization of neuronal actin structure.                                                                                                                                                                                                                                    |

|              |        |        |                     |                                                                                                                                                                                                                                                                                                                                                                  |
|--------------|--------|--------|---------------------|------------------------------------------------------------------------------------------------------------------------------------------------------------------------------------------------------------------------------------------------------------------------------------------------------------------------------------------------------------------|
| Contig008230 | 2,E-05 | 2,E-03 | <i>MARCO</i>        | The protein encoded by this gene is a member of the class A scavenger receptor family and is part of the innate antimicrobial immune system.                                                                                                                                                                                                                     |
| Contig006706 | 2,E-05 | 2,E-03 | <i>LOC103918151</i> |                                                                                                                                                                                                                                                                                                                                                                  |
| Contig012327 | 2,E-05 | 3,E-03 | <i>LOC103913537</i> |                                                                                                                                                                                                                                                                                                                                                                  |
| Contig014887 | 2,E-05 | 3,E-03 | <i>LOC103912710</i> |                                                                                                                                                                                                                                                                                                                                                                  |
| Contig000873 | 3,E-05 | 3,E-03 | <i>MPHOSPH9</i>     | Angiotensinogen precursor, expressed in the liver and is cleaved by the enzyme renin in response to lowered blood pressure.                                                                                                                                                                                                                                      |
| Contig010691 | 3,E-05 | 3,E-03 | <i>LOC103895549</i> |                                                                                                                                                                                                                                                                                                                                                                  |
| Contig001492 | 3,E-05 | 3,E-03 | <i>AGT*</i>         | The protein encoded by this gene, is expressed in the liver and is cleaved by the enzyme renin in response to lowered blood pressure. Is involved in maintaining blood pressure and in the pathogenesis of essential hypertension and preeclampsia.                                                                                                              |
| Contig007178 | 3,E-05 | 4,E-03 | <i>RHBDF1</i>       | Rhomboid protease-like protein which has no protease activity but regulates the secretion of several ligands of the epidermal growth factor receptor. Indirectly activates the epidermal growth factor receptor signaling pathway and may thereby regulate sleep, cell survival, proliferation and migration                                                     |
| Contig004692 | 4,E-05 | 4,E-03 | <i>ZBTB42</i>       | The protein encoded by this gene is a member of the C2H2 zinc finger protein family. Transcriptional repressor. Specifically binds DNA and probably acts by recruiting chromatin remodeling multiprotein complexes.                                                                                                                                              |
| Contig013099 | 4,E-05 | 4,E-03 | <i>LOC103907580</i> |                                                                                                                                                                                                                                                                                                                                                                  |
| Contig010126 | 4,E-05 | 4,E-03 | <i>LUZP1</i>        | This gene encodes a protein that contains a leucine zipper motif. The exact function of the encoded protein is not known.                                                                                                                                                                                                                                        |
| Contig004569 | 4,E-05 | 4,E-03 | <i>TDP1*</i>        | Member of the phospholipase D family. Involved in repairing stalled topoisomerase I-DNA complexes. Has a role in repair of free-radical mediated DNA double-strand breaks                                                                                                                                                                                        |
| Contig015308 | 5,E-05 | 4,E-03 | <i>UPF2*</i>        | This gene encodes a protein that is part of a post-splicing multiprotein complex involved in both mRNA nuclear export and mRNA surveillance.                                                                                                                                                                                                                     |
| Contig011340 | 5,E-05 | 4,E-03 | <i>FUT7</i>         | The protein encoded by this gene is a Golgi stack membrane protein that is involved in the creation of sialyl-Lewis X antigens.                                                                                                                                                                                                                                  |
| Contig002045 | 5,E-05 | 5,E-03 | <i>LOC101876482</i> |                                                                                                                                                                                                                                                                                                                                                                  |
| Contig003143 | 6,E-05 | 5,E-03 | <i>USPL1</i>        | Involved in protein desumoylation                                                                                                                                                                                                                                                                                                                                |
| Contig010213 | 6,E-05 | 5,E-03 | <i>ATP13A3</i>      | ATPase Family, transport of cations across membranes                                                                                                                                                                                                                                                                                                             |
| Contig004635 | 7,E-05 | 5,E-03 | <i>EML1</i>         | Echinoderm microtubule-associated protein-like. Modulates the assembly and organization of the microtubule cytoskeleton, and probably plays a role in regulating the orientation of the mitotic spindle and the orientation of the plane of cell division                                                                                                        |
| Contig004893 | 7,E-05 | 5,E-03 | <i>CHAF1B*</i>      | Required for the assembly of histone octamers onto newly-replicated DNA                                                                                                                                                                                                                                                                                          |
| Contig006216 | 7,E-05 | 6,E-03 | <i>RAD52*</i>       | Related to DNA recombination and repair                                                                                                                                                                                                                                                                                                                          |
| Contig012901 | 1,E-04 | 8,E-03 | <i>FGB*</i>         | The protein encoded by this gene is the beta component of fibrinogen, a blood-borne glycoprotein comprised of three pairs of nonidentical polypeptide chains. In addition, various cleavage products of fibrinogen and fibrin regulate cell adhesion and spreading, display vasoconstrictor and chemotactic activities, and are mitogens for several cell types. |
| Contig014626 | 1,E-04 | 8,E-03 | <i>CCDC73</i>       | Cell-surface proteins with role in regulation of cell development, activation, growth and motility                                                                                                                                                                                                                                                               |
| Contig012690 | 1,E-04 | 8,E-03 | <i>LOC103913273</i> |                                                                                                                                                                                                                                                                                                                                                                  |
| Contig009719 | 1,E-04 | 8,E-03 | <i>TSPAN8*</i>      | The proteins mediate signal transduction events that play a role in the regulation of cell development, activation, growth and motility.                                                                                                                                                                                                                         |
| Contig002016 | 0.0001 | 0.0085 | <i>SLC26A9</i>      | The product of this gene is a highly selective chloride ion channel regulated by WNK kinases. Alternative splicing results in multiple transcript variants encoding differing isoforms.                                                                                                                                                                          |
| Contig015942 | 1,E-04 | 9,E-03 | <i>IL18RAP*</i>     | The protein encoded by this gene is an accessory subunit of the heterodimeric receptor for interleukin 18 (IL18), a proinflammatory cytokine involved in inducing cell-mediated immunity.                                                                                                                                                                        |

|              |        |        |                     |                                                                                                                                                                                                                                                                                                                                                                                                                                             |
|--------------|--------|--------|---------------------|---------------------------------------------------------------------------------------------------------------------------------------------------------------------------------------------------------------------------------------------------------------------------------------------------------------------------------------------------------------------------------------------------------------------------------------------|
| Contig004964 | 1,E-04 | 9,E-03 | <i>GPR82</i>        | The protein encoded by this gene is an orphan G protein-coupled receptor of unknown function.                                                                                                                                                                                                                                                                                                                                               |
| Contig011912 | 2,E-04 | 1,E-02 | <i>TENM2*</i>       | Involved in neural development, regulating the establishment of proper connectivity within the nervous system. Promotes the formation of filopodia and enlarged growth cone in neuronal cells                                                                                                                                                                                                                                               |
| Contig013612 | 2,E-04 | 1,E-02 | <i>AKAP1</i>        | The A-kinase anchor proteins (AKAPs) are a group of structurally diverse proteins, which have the common function of binding to the regulatory subunit of protein kinase A (PKA) and confining the holoenzyme to discrete locations within the cell.                                                                                                                                                                                        |
| Contig011182 | 2,E-04 | 1,E-02 | <i>CDPF1</i>        | Cysteine Rich DPF Motif Domain Containing 1                                                                                                                                                                                                                                                                                                                                                                                                 |
| Contig010454 | 2,E-04 | 1,E-02 | <i>RAD21L1*</i>     | Meiosis-specific component of some cohesin complex required during the initial steps of prophase I in male meiosis.                                                                                                                                                                                                                                                                                                                         |
| Contig005165 | 2,E-04 | 1,E-02 | <i>LOC103916848</i> |                                                                                                                                                                                                                                                                                                                                                                                                                                             |
| Contig002300 | 2,E-04 | 1,E-02 | <i>F2*</i>          | Coagulation factor II is proteolytically cleaved to form thrombin in the first step of the coagulation cascade which ultimately results in the stemming of blood loss. F2 also plays a role in maintaining vascular integrity during development and postnatal life. Peptides derived from the C-terminus of this protein have antimicrobial activity against <i>E. coli</i> and <i>P. aeruginosa</i> .                                     |
| Contig009500 | 2,E-04 | 1,E-02 | <i>STOX1*</i>       | DNA binding protein                                                                                                                                                                                                                                                                                                                                                                                                                         |
| Contig008168 | 2,E-04 | 1,E-02 | <i>NPL*</i>         | Gene encodes a member of the N-acetylneuraminase lyase subfamily of (beta/alpha)(8)-barrel enzymes.                                                                                                                                                                                                                                                                                                                                         |
| Contig005680 | 3,E-04 | 1,E-02 | <i>RUFY3</i>        | This gene encodes a RPIP8, UNC-14, and NESCA domain-containing protein that is required for maintenance of neuronal polarity and axon growth                                                                                                                                                                                                                                                                                                |
| Contig008788 | 3,E-04 | 1,E-02 | <i>OSGEPL1*</i>     | Involved in mitochondrial genome maintenance.                                                                                                                                                                                                                                                                                                                                                                                               |
| Contig001645 | 3,E-04 | 2,E-02 | <i>SETX*</i>        | Protein encoded contain a DNA/RNA helicase domain, involved in DNA/RNA processing                                                                                                                                                                                                                                                                                                                                                           |
| Contig003495 | 3,E-04 | 2,E-02 | <i>PLXNB2</i>       | Transmembrane receptors that participate in axon guidance and cell migration in response to semaphorins                                                                                                                                                                                                                                                                                                                                     |
| Contig013796 | 3,E-04 | 2,E-02 | <i>CARD9*</i>       | Adapter protein that plays a key role in innate immune response to a number of intracellular pathogens                                                                                                                                                                                                                                                                                                                                      |
| Contig014194 | 3,E-04 | 2,E-02 | <i>KNG1*</i>        | This gene uses alternative splicing to generate two different proteins- high molecular weight kininogen (HMWK) and low molecular weight kininogen (LMWK). HMWK is essential for blood coagulation and assembly of the kallikrein-kinin system. Also, bradykinin, a peptide causing numerous physiological effects, is released from HMWK. Bradykinin also functions as an antimicrobial peptide with antibacterial and antifungal activity. |
| Contig009432 | 4,E-04 | 2,E-02 | <i>AFTPH</i>        | May play a role in membrane trafficking.                                                                                                                                                                                                                                                                                                                                                                                                    |
| Contig012154 | 4,E-04 | 2,E-02 | <i>IRF1*</i>        | The encoded protein activates the transcription of genes involved in the body's response to viruses and bacteria, playing a role in cell proliferation, apoptosis, the immune response, and DNA damage response.                                                                                                                                                                                                                            |
| Contig002792 | 4,E-04 | 2,E-02 | <i>ACSL5</i>        | Acyl-CoA Synthetase Long Chain Family Member 5. Activate long-chain fatty acids for both synthesis of cellular lipids, and degradation via beta-oxidation                                                                                                                                                                                                                                                                                   |
| Contig008467 | 5,E-04 | 2,E-02 | <i>MME*</i>         | The protein encoded by this gene is a type II transmembrane glycoprotein and a common acute lymphocytic leukemia antigen                                                                                                                                                                                                                                                                                                                    |
| Contig000726 | 5,E-04 | 2,E-02 | <i>PHF3</i>         | This gene encodes a member of a PHD finger-containing gene family. This gene may function as a transcription factor and may be involved in glioblastomas development.                                                                                                                                                                                                                                                                       |
| Contig011577 | 6,E-04 | 2,E-02 | <i>FYCO1</i>        | The encoded protein plays a role in microtubule plus end-directed transport of autophagic vesicles                                                                                                                                                                                                                                                                                                                                          |
| Contig005040 | 6,E-04 | 2,E-02 | <i>ZNF292</i>       | This gene encodes a growth hormone-dependent, zinc finger transcription factor that functions as a tumor suppressor. May be involved in transcriptional regulation.                                                                                                                                                                                                                                                                         |
| Contig004617 | 6,E-04 | 2,E-02 | <i>BDKRB2*</i>      | This gene encodes a receptor for bradykinin. The 9 aa bradykinin peptide elicits many responses including vasodilation, edema, smooth muscle spasm and pain fiber stimulation.                                                                                                                                                                                                                                                              |
| Contig005588 | 6,E-04 | 2,E-02 | <i>ROS1</i>         | This proto-oncogene, highly-expressed in a variety of tumor cell lines. The protein may function as a growth or differentiation factor receptor.                                                                                                                                                                                                                                                                                            |
| Contig012421 | 6,E-04 | 2,E-02 | <i>TRAF7*</i>       | Signal transducers for members of the Tumor necrosis factor (TNF) receptor superfamily                                                                                                                                                                                                                                                                                                                                                      |

|              |        |        |                     |                                                                                                                                                                                                                                                                                                     |
|--------------|--------|--------|---------------------|-----------------------------------------------------------------------------------------------------------------------------------------------------------------------------------------------------------------------------------------------------------------------------------------------------|
| Contig002799 | 6,E-04 | 2,E-02 | <i>DCLRE1A*</i>     | This gene encodes a conserved protein that is involved in the repair of DNA interstrand cross-links. DNA cross-links suppress transcription, replication, and DNA segregation.                                                                                                                      |
| Contig007834 | 7,E-04 | 3,E-02 | <i>CUL1*</i>        | Core component of multiple cullin-RING-based SCF (SKP1-CUL1-F-box protein) E3 ubiquitin-protein ligase complexes, which mediate the ubiquitination of proteins involved in cell cycle progression, signal transduction and transcription.                                                           |
| Contig012841 | 7,E-04 | 3,E-02 | <i>LOC103925145</i> |                                                                                                                                                                                                                                                                                                     |
| Contig004858 | 7,E-04 | 3,E-02 | <i>URB1</i>         | Encodes a member of the KH-domain protein subfamily                                                                                                                                                                                                                                                 |
| Contig004776 | 8,E-04 | 3,E-02 | <i>PCBP3*</i>       | This gene encodes a member of the KH-domain protein subfamily. Proteins of this subfamily, also referred to as alpha-CPs, bind to RNA with a specificity for C-rich pyrimidine regions. Alpha-CPs play important roles in post-transcriptional activities and have different cellular distributions |
| Contig002592 | 8,E-04 | 3,E-02 | <i>ZFAND4*</i>      | ZFAND4 (Zinc Finger AN1-Type Containing 4) is a Protein Coding gene. An important paralog of this gene is RPS27A.                                                                                                                                                                                   |
| Contig008790 | 9,E-04 | 3,E-02 | <i>ASNSD1*</i>      | Asparagine Synthetase Domain Containing                                                                                                                                                                                                                                                             |
| Contig015747 | 9,E-04 | 3,E-02 | <i>ODC1*</i>        | Protein homodimerization activity and ornithine decarboxylase activity                                                                                                                                                                                                                              |
| Contig013582 | 9,E-04 | 3,E-02 | <i>BRIP1*</i>       | Member of ResQDEAH helicase family. Involved in the repair of DNA double-strand breaks by homologous recombination                                                                                                                                                                                  |
| Contig001025 | 9,E-04 | 3,E-02 | <i>ORC1*</i>        | Component of the origin recognition complex (ORC) involved in the initiation of DNA replication                                                                                                                                                                                                     |
| Contig000277 | 1,E-03 | 3,E-02 | <i>LOC103924632</i> |                                                                                                                                                                                                                                                                                                     |
| Contig001865 | 1,E-03 | 4,E-02 | <i>ACD*</i>         | Involved in the regulation of telomere length and protection                                                                                                                                                                                                                                        |
| Contig014199 | 1,E-03 | 4,E-02 | <i>AHSG*</i>        | It is involved in several processes, including endocytosis, brain development, and the formation of bone tissue                                                                                                                                                                                     |
| Contig005311 | 1,E-03 | 4,E-02 | <i>GTF2IRD1</i>     | May be a transcription regulator involved in cell-cycle progression and skeletal muscle differentiation. plays a role in craniofacial and cognitive development                                                                                                                                     |
| Contig007073 | 1,E-03 | 4,E-02 | <i>GLIPR1*</i>      | This gene encodes a protein with similarity to both the pathogenesis-related protein (PR) superfamily and the cysteine-rich secretory protein (CRISP) family                                                                                                                                        |
| Contig004531 | 1,E-03 | 4,E-02 | <i>LOC113480798</i> |                                                                                                                                                                                                                                                                                                     |
| Contig006655 | 1,E-03 | 4,E-02 | <i>PPFIA1</i>       | Obsolete signal transducer activity                                                                                                                                                                                                                                                                 |
| Contig008336 | 1,E-03 | 5,E-02 | <i>LOC103915646</i> |                                                                                                                                                                                                                                                                                                     |
| Contig004632 | 1,E-03 | 5,E-02 | <i>LOC103920698</i> |                                                                                                                                                                                                                                                                                                     |
| Contig007136 | 1,E-03 | 5,E-02 | <i>LOC105414297</i> |                                                                                                                                                                                                                                                                                                     |
| Contig014145 | 1,E-03 | 5,E-02 | <i>LOC103919172</i> |                                                                                                                                                                                                                                                                                                     |
| Contig009830 | 2,E-03 | 5,E-02 | <i>ZNF518B</i>      | May be involved in transcriptional regulation                                                                                                                                                                                                                                                       |
| Contig004787 | 2,E-03 | 5,E-02 | <i>ITGB2*</i>       | This gene encodes an integrin beta chain. Integrins participate in cell adhesion and cell-surface mediated signalling. Plays a role in immune response.                                                                                                                                             |
| Contig000492 | 2,E-03 | 5,E-02 | <i>ARHGAP5</i>      | May mediate cytoskeleton changes                                                                                                                                                                                                                                                                    |
| Contig013992 | 2,E-03 | 5,E-02 | <i>PABPC4*</i>      | Binds the poly(A) tail of mRNA. May be involved in cytoplasmic regulatory processes of mRNA metabolism. PABPC4 was also identified as an antigen.                                                                                                                                                   |
| Contig007716 | 2,E-03 | 5,E-02 | <i>TM4SF4*</i>      | Regulates the adhesive and proliferative status of intestinal epithelial cells                                                                                                                                                                                                                      |
| Contig009580 | 2,E-03 | 5,E-02 | <i>LOC103914698</i> |                                                                                                                                                                                                                                                                                                     |
| Contig014367 | 2,E-03 | 5,E-02 | <i>WDHD1*</i>       | Brings together MCM2-7 helicase and DNA polymerase alpha/primase complex to initiate DNA replication                                                                                                                                                                                                |
| Contig004102 | 2,E-03 | 5,E-02 | <i>CLK1</i>         | Involved in gene splicing regulation                                                                                                                                                                                                                                                                |
| Contig014022 | 2,E-03 | 5,E-02 | <i>CCDC79*</i>      | Involved in meiotic telomere attachment to the nucleus inner membrane                                                                                                                                                                                                                               |

**Table S13.** Codon-based tests of positive selection for Myoglobin (*MB*) between pairwise penguin genomes. Significant Z-values ( $d_N/d_S$  test) of selection for *MB* are indicated in dark gray ( $p < 0.05$ ) and near significant values in light gray ( $p = 0.055$ ). *MB* overall positive selection,  $Z = 2.645$ ,  $p = 0.005$ .

|                     | Southern rockhopper | Eastern rockhopper | Erect-crested | Macaroni-Antarctica | Fiordland    | Royal        | Macaroni-Marion | Emperor | King  | Little | Northern rockhopper | African | Galápagos | Humboldt | Magellanic | Gentoo-Antarctica | Gentoo-Kerguelen | Gentoo-Crozet | Gentoo-Falkland | Chinstrap    | Adélie       |  |
|---------------------|---------------------|--------------------|---------------|---------------------|--------------|--------------|-----------------|---------|-------|--------|---------------------|---------|-----------|----------|------------|-------------------|------------------|---------------|-----------------|--------------|--------------|--|
| Southern rockhopper |                     |                    |               |                     |              |              |                 |         |       |        |                     |         |           |          |            |                   |                  |               |                 |              |              |  |
| Eastern rockhopper  | 0.000               |                    |               |                     |              |              |                 |         |       |        |                     |         |           |          |            |                   |                  |               |                 |              |              |  |
| Erect-crested       | -1.006              | -1.006             |               |                     |              |              |                 |         |       |        |                     |         |           |          |            |                   |                  |               |                 |              |              |  |
| Macaroni-Antarctica | 0.000               | 0.000              | -1.006        |                     |              |              |                 |         |       |        |                     |         |           |          |            |                   |                  |               |                 |              |              |  |
| Fiordland           | 0.000               | 0.000              | -1.006        | 0.000               |              |              |                 |         |       |        |                     |         |           |          |            |                   |                  |               |                 |              |              |  |
| Royal               | 0.000               | 0.000              | -1.006        | 0.000               | 0.000        |              |                 |         |       |        |                     |         |           |          |            |                   |                  |               |                 |              |              |  |
| Macaroni-Marion     | 0.000               | 0.000              | -1.006        | 0.000               | 0.000        | 0.000        |                 |         |       |        |                     |         |           |          |            |                   |                  |               |                 |              |              |  |
| Emperor             | 0.911               | 0.911              | 0.339         | 0.911               | 0.911        | 0.911        | 0.911           |         |       |        |                     |         |           |          |            |                   |                  |               |                 |              |              |  |
| King                | 1.032               | 1.032              | 0.451         | 1.032               | 1.032        | 1.032        | 1.032           | 1.001   |       |        |                     |         |           |          |            |                   |                  |               |                 |              |              |  |
| Little              | <b>1.609</b>        | <b>1.609</b>       | 0.445         | <b>1.609</b>        | <b>1.609</b> | <b>1.609</b> | <b>1.609</b>    | -0.063  | 0.068 |        |                     |         |           |          |            |                   |                  |               |                 |              |              |  |
| Northern rockhopper | 0.000               | 0.000              | -1.006        | 0.000               | 0.000        | 0.000        | 0.000           | 0.911   | 1.032 | 1.609  |                     |         |           |          |            |                   |                  |               |                 |              |              |  |
| African             | <b>1.609</b>        | <b>1.609</b>       | 0.445         | <b>1.609</b>        | <b>1.609</b> | <b>1.609</b> | <b>1.609</b>    | -0.063  | 0.068 | 0.000  | <b>1.609</b>        |         |           |          |            |                   |                  |               |                 |              |              |  |
| Galápagos           | <b>1.609</b>        | <b>1.609</b>       | 0.445         | <b>1.609</b>        | <b>1.609</b> | <b>1.609</b> | <b>1.609</b>    | -0.063  | 0.068 | 0.000  | <b>1.609</b>        | 0.000   |           |          |            |                   |                  |               |                 |              |              |  |
| Humboldt            | <b>1.609</b>        | <b>1.609</b>       | 0.445         | <b>1.609</b>        | <b>1.609</b> | <b>1.609</b> | <b>1.609</b>    | -0.063  | 0.068 | 0.000  | <b>1.609</b>        | 0.000   | 0.000     |          |            |                   |                  |               |                 |              |              |  |
| Magellanic          | <b>1.609</b>        | <b>1.609</b>       | 0.445         | <b>1.609</b>        | <b>1.609</b> | <b>1.609</b> | <b>1.609</b>    | -0.063  | 0.068 | 0.000  | <b>1.609</b>        | 0.000   | 0.000     | 0.000    |            |                   |                  |               |                 |              |              |  |
| Gentoo-Antarctica   | <b>3.549</b>        | <b>3.549</b>       | <b>2.234</b>  | <b>3.549</b>        | <b>3.549</b> | <b>3.549</b> | <b>3.549</b>    | 0.354   | 0.479 | 1.104  | <b>3.549</b>        | 1.104   | 1.104     | 1.104    | 1.104      |                   |                  |               |                 |              |              |  |
| Gentoo-Kerguelen    | <b>3.549</b>        | <b>3.549</b>       | <b>2.234</b>  | <b>3.549</b>        | <b>3.549</b> | <b>3.549</b> | <b>3.549</b>    | 0.354   | 0.479 | 1.104  | <b>3.549</b>        | 1.104   | 1.104     | 1.104    | 1.104      | 0.000             |                  |               |                 |              |              |  |
| Gentoo-Crozet       | <b>3.549</b>        | <b>3.549</b>       | <b>2.234</b>  | <b>3.549</b>        | <b>3.549</b> | <b>3.549</b> | <b>3.549</b>    | 0.354   | 0.479 | 1.104  | <b>3.549</b>        | 1.104   | 1.104     | 1.104    | 1.104      | 0.000             | 0.000            |               |                 |              |              |  |
| Gentoo-Falkland     | <b>3.549</b>        | <b>3.549</b>       | <b>2.234</b>  | <b>3.549</b>        | <b>3.549</b> | <b>3.549</b> | <b>3.549</b>    | 0.354   | 0.479 | 1.104  | <b>3.549</b>        | 1.104   | 1.104     | 1.104    | 1.104      | 0.000             | 0.000            | 0.000         |                 |              |              |  |
| Chinstrap           | <b>3.134</b>        | <b>3.134</b>       | <b>1.835</b>  | <b>3.134</b>        | <b>3.134</b> | <b>3.134</b> | <b>3.134</b>    | 0.487   | 0.609 | 0.965  | <b>3.134</b>        | 0.965   | 0.965     | 0.965    | 0.965      | <b>1.739</b>      | <b>1.739</b>     | <b>1.739</b>  | <b>1.739</b>    |              |              |  |
| Adélie              | <b>1.814</b>        | <b>1.814</b>       | 1.018         | <b>1.814</b>        | <b>1.814</b> | <b>1.814</b> | <b>1.814</b>    | -0.027  | 0.086 | 0.314  | <b>1.814</b>        | 0.314   | 0.314     | 0.314    | 0.314      | <b>2.252</b>      | <b>2.252</b>     | <b>2.252</b>  | <b>2.252</b>    | <b>2.252</b> | <b>2.470</b> |  |

## References

1. Pertierra LR, *et al.* (2020) Cryptic speciation in gentoo penguins is driven by geographic isolation and regional marine conditions: Unforeseen vulnerabilities to global change. *Diversity and Distributions* n/a(n/a).
2. Vianna JA, *et al.* (2017) Marked phylogeographic structure of Gentoo penguin reveals an ongoing diversification process along the Southern Ocean. *Mol Phylogenet Evol* 107:486-498.
3. Levy H, *et al.* (2020) Evidence of Pathogen-Induced Immunogenetic Selection across the Large Geographic Range of a Wild Seabird. *Molecular Biology and Evolution* 37(6):1708-1726.
4. Aljanabi SM & Martinez I (1997) Universal and rapid salt-extraction of high quality genomic DNA for PCR-based techniques. *Nucleic Acids Res* 25(22):4692-4693.
5. Martin M (2011) Cutadapt removes adapter sequences from high-throughput sequencing reads. *2011* 17(1):3.
6. Bolger AM, Lohse M, & Usadel B (2014) Trimmomatic: a flexible trimmer for Illumina sequence data. *Bioinformatics* 30(15):2114-2120.
7. Magoc T & Salzberg SL (2011) FLASH: fast length adjustment of short reads to improve genome assemblies. *Bioinformatics* 27(21):2957-2963.
8. Frith MC, Wan R, & Horton P (2010) Incorporating sequence quality data into alignment improves DNA read mapping. *Nucleic Acids Research* 38(7):e100-e100.
9. Li H, *et al.* (2009) The Sequence Alignment/Map format and SAMtools. *Bioinformatics* 25(16):2078-2079.
10. Katoh K & Standley DM (2013) MAFFT multiple sequence alignment software version 7: improvements in performance and usability. *Mol Biol Evol* 30(4):772-780.
11. Capella-Gutierrez S, Silla-Martinez JM, & Gabaldon T (2009) trimAl: a tool for automated alignment trimming in large-scale phylogenetic analyses. *Bioinformatics* 25(15):1972-1973.
12. Bradnam KR, *et al.* (2013) Assemblathon 2: evaluating de novo methods of genome assembly in three vertebrate species. *GigaScience* 2(1).
13. Kriventseva EV, Zdobnov EM, Simão FA, Ioannidis P, & Waterhouse RM (2015) BUSCO: assessing genome assembly and annotation completeness with single-copy orthologs. *Bioinformatics* 31(19):3210-3212.
14. Stanke M & Morgenstern B (2005) AUGUSTUS: a web server for gene prediction in eukaryotes that allows user-defined constraints. *Nucleic acids research* 33(Web Server issue):W465-W467.
15. Mapleson D, Garcia Accinelli G, Kettleborough G, Wright J, & Clavijo BJ (2017) KAT: a K-mer analysis toolkit to quality control NGS datasets and genome assemblies. *Bioinformatics (Oxford, England)* 33(4):574-576.
16. Faircloth BC (2016) PHYLUCE is a software package for the analysis of conserved genomic loci. *Bioinformatics* 32(5):786-788.

17. Faircloth BC, *et al.* (2012) Ultraconserved elements anchor thousands of genetic markers spanning multiple evolutionary timescales. *Syst Biol* 61(5):717-726.
18. Streicher JW, Schulte JA, II, & Wiens JJ (2015) How Should Genes and Taxa be Sampled for Phylogenomic Analyses with Missing Data? An Empirical Study in Iguanian Lizards. *Systematic Biology* 65(1):128-145.
19. Jarvis ED, *et al.* (2014) Whole-genome analyses resolve early branches in the tree of life of modern birds. *Science (New York, N.Y.)* 346(6215):1320-1331.
20. Ramos B, *et al.* (2018) Landscape genomics: natural selection drives the evolution of mitogenome in penguins. *BMC Genomics* 19(1):53.
21. Kalyaanamoorthy S, Minh BQ, Wong TKF, von Haeseler A, & Jermin LS (2017) ModelFinder: fast model selection for accurate phylogenetic estimates. *Nature Methods* 14:587.
22. Nguyen L-T, Schmidt HA, von Haeseler A, & Minh BQ (2015) IQ-TREE: A Fast and Effective Stochastic Algorithm for Estimating Maximum-Likelihood Phylogenies. *Molecular Biology and Evolution* 32(1):268-274.
23. Hoang DT, Chernomor O, von Haeseler A, Minh BQ, & Vinh LS (2018) UFBoot2: Improving the Ultrafast Bootstrap Approximation. *Mol Biol Evol* 35(2):518-522.
24. Zhang C, Rabiee M, Sayyari E, & Mirarab S (2018) ASTRAL-III: polynomial time species tree reconstruction from partially resolved gene trees. *BMC bioinformatics* 19(Suppl 6):153.
25. Kozlov AM, Darriba D, Flouri T, Morel B, & Stamatakis A (2018) RAXML-NG: A fast, scalable, and user-friendly tool for maximum likelihood phylogenetic inference. *bioRxiv*:447110.
26. Sayyari E & Mirarab S (2016) Fast Coalescent-Based Computation of Local Branch Support from Quartet Frequencies. *Molecular Biology and Evolution* 33(7):1654-1668.
27. Bouckaert R, *et al.* (2014) BEAST 2: a software platform for Bayesian evolutionary analysis. *PLoS Comput Biol* 10(4):e1003537.
28. Miller MA, Pfeiffer W, & Schwartz T (2010) Creating the CIPRES Science Gateway for inference of large phylogenetic trees. *2010 Gateway Computing Environments Workshop (GCE)*, pp 1-8.
29. Cole TL, *et al.* (2019) Mitogenomes Uncover Extinct Penguin Taxa and Reveal Island Formation as a Key Driver of Speciation. *Mol Biol Evol* 36(4):784-797.
30. Slack KE, *et al.* (2006) Early penguin fossils, plus mitochondrial genomes, calibrate avian evolution. *Mol Biol Evol* 23(6):1144-1155.
31. Hospitalache CAT, C.; Donato, M.; Cozzuol M. (2007) A new Miocene penguin from Patagonia and its phylogenetic relationships. *Acta Palaeontologica Polonica* 52(2):299-314.
32. Ksepka DT & Clarke JA (2010) The Basal Penguin (Aves: Sphenisciformes) *Perudyptes devriesi* and a Phylogenetic Evaluation of the Penguin Fossil Record. *Bulletin of the American Museum of Natural History* 337:1-77.
33. Degrange FJ, Ksepka DT, & Tambussi CP (2018) Redescription of the oldest crown clade penguin: cranial osteology, jaw myology, neuroanatomy, and phylogenetic affinities of *Madrynornis mirandus*. *Journal of Vertebrate Paleontology* 38(2):e1445636.

34. Hoffmeister CM, Briceño JDC, & Nielsen SN (2014) The Evolution of Seabirds in the Humboldt Current: New Clues from the Pliocene of Central Chile. *PLOS ONE* 9(3):e90043.
35. Marquardt C, *et al.* (2000) Estratigrafía del Cenozoico Superior en el área de Caldera (26°45' - 28°S), III Región de Atacama. *In Congreso Geológico Chileno, No. 9, Actas: 504-508. Puerto Varas.*
36. Brand L, Urbina M, Chadwick A, DeVries TJ, & Esperante R (2011) A high resolution stratigraphic framework for the remarkable fossil cetacean assemblage of the Miocene/Pliocene Pisco Formation. *Peru. J S Am Earth Sci* 31:414.
37. Ksepka DT & Thomas DB (2012) Multiple cenozoic invasions of Africa by penguins (Aves, Sphenisciformes). *Proc Biol Sci* 279(1730):1027-1032.
38. Thomas DB & Ksepka DT (2013) A history of shifting fortunes for African penguins. *Zoological Journal of the Linnean Society* 168(1):207-219.
39. Naish TR, *et al.* (2005) An integrated sequence stratigraphic, palaeoenvironmental, and chronostratigraphic analysis of the Tangahoe Formation, southern Taranaki coast, with implications for mid-Pliocene (c. 3.4–3.0 Ma) glacio-eustatic sea-level changes. *J Roy Soc New Zeal* 35:151-196.
40. Rambaut A, Drummond AJ, Xie D, Baele G, & Suchard MA (2018) Posterior Summarization in Bayesian Phylogenetics Using Tracer 1.7. *Systematic Biology* 67(5):901-904.
41. Sarver BAJ, *et al.* (2018) The choice of tree prior and molecular clock does not substantially affect phylogenetic inferences of diversification rates. *bioRxiv:358788.*
42. Frugone MJ, *et al.* (2018) Contrasting phylogeographic pattern among Eudyptes penguins around the Southern Ocean. *Sci Rep* 8(1):17481.
43. Frugone MJ, *et al.* (2019) More than the eye can see: Genomic insights into the drivers of genetic differentiation in Royal/Macaroni penguins across the Southern Ocean. *Molecular Phylogenetics and Evolution* 139:106563.
44. Paradis E & Schliep K (2019) ape 5.0: an environment for modern phylogenetics and evolutionary analyses in R. *Bioinformatics* 35(3):526-528.
45. Matzke N (2013) BioGeoBEARS: BioGeography with Bayesian (and Likelihood) Evolutionary Analysis in R Scripts. *University of California, Berkeley, Berkeley, CA.* .
46. Ree RH & Smith SA (2008) Maximum likelihood inference of geographic range evolution by dispersal, local extinction, and cladogenesis. *Syst Biol* 57(1):4-14.
47. Ronquist F (1997) Dispersal-Vicariance Analysis: A New Approach to the Quantification of Historical Biogeography. *Systematic Biology* 46(1):195-203.
48. Landis MJ, Matzke NJ, Moore BR, & Huelsenbeck JP (2013) Bayesian Analysis of Biogeography when the Number of Areas is Large. *Systematic Biology* 62(6):789-804.
49. Templeton AR (1980) The theory of speciation via the founder principle. *Genetics* 94(4):1011-1038.
50. Matzke NJ (2014) Model selection in historical biogeography reveals that founder-event speciation is a crucial process in Island Clades. *Systematic Biology* 63(6):951-970.



51. Matzke NJ (2013) Probabilistic historical biogeography: new models for founder-event speciation, imperfect detection, and fossils allow improved accuracy and model-testing. *Frontiers of Biogeography* 5(4).
52. Bertelli S & Giannini NP (2005) A phylogeny of extant penguins (Aves: Sphenisciformes) combining morphology and mitochondrial sequences. *Cladistics* 21(3):209-239.
53. International HotBotWaB (2017) Handbook of the Birds of the World and BirdLife International digital checklist of the birds of the world. Version 9.1.
54. Cristofari R, *et al.* (2016) Full circumpolar migration ensures evolutionary unity in the Emperor penguin. *Nat Commun* 7:11842.
55. Clucas GV, *et al.* (2018) Comparative population genomics reveals key barriers to dispersal in Southern Ocean penguins. *Molecular Ecology* 27(23):4680-4697.
56. Assis J, *et al.* (2018) Bio-ORACLE v2.0: Extending marine data layers for bioclimatic modelling. *Global Ecology and Biogeography* 27(3):277-284.
57. Phillips SJ, Anderson RP, & Schapire RE (2006) Maximum entropy modeling of species geographic distributions. *Ecological Modelling* 190(3):231-259.
58. Warren DL, Glor RE, & Turelli M (2008) Environmental niche equivalency versus conservatism: quantitative approaches to niche evolution. *Evolution* 62(11):2868-2883.
59. Evans ME, Smith SA, Flynn RS, & Donoghue MJ (2009) Climate, niche evolution, and diversification of the "bird-cage" evening primroses (Oenothera, sections Anogra and Kleinia). *The American naturalist* 173(2):225-240.
60. Pease JB & Hahn MW (2015) Detection and polarization of introgression in a five-taxon phylogeny. *Systematic Biology* 64(4):651-662
61. Li H & Durbin R (2011) Inference of human population history from individual whole-genome sequences. *Nature* 475(7357):493-496.
62. Li H, Handsaker B, Marshall J, & Danecek P (2015) Samtools. Version 1.3 with HTSlib 1.3.1 [01 October 2016];<http://www.htslib.org>.
63. Narasimhan V, *et al.* (2016) BCFtools/RoH: a hidden Markov model approach for detecting autozygosity from next-generation sequencing data. *Bioinformatics* 32(11):1749-1751.
64. Nadachowska-Brzyska K, Li C, Smeds L, Zhang G, & Ellegren H (2015) Temporal Dynamics of Avian Populations during Pleistocene Revealed by Whole-Genome Sequences. *Curr Biol* 25(10):1375-1380.
65. Nam K, *et al.* (2010) Molecular evolution of genes in avian genomes. *Genome Biol* 11(6):R68.
66. FORCADA J & TRATHAN PN (2009) Penguin responses to climate change in the Southern Ocean. *Global Change Biology* 15(7):1618-1630.
67. Lande R, Engen S, & Saether B (2003) Stochastic Population Dynamics in Ecology and Conservation. *Oxford University Press*.
68. Huerta-Cepas J, Serra F, & Bork P (2016) ETE 3: Reconstruction, Analysis, and Visualization of Phylogenomic Data. *Mol Biol Evol* 33(6):1635-1638.
69. Yang Z (1997) PAML: a program package for phylogenetic analysis by maximum likelihood. *Computer applications in the biosciences : CABIOS* 13(5):555-556.

70. Wang J, Vasaikar S, Shi Z, Greer M, & Zhang B (2017) WebGestalt 2017: a more comprehensive, powerful, flexible and interactive gene set enrichment analysis toolkit. *Nucleic Acids Res* 45(W1):W130-W137.
71. Szklarczyk D, *et al.* (2019) STRING v11: protein-protein association networks with increased coverage, supporting functional discovery in genome-wide experimental datasets. *Nucleic Acids Res* 47(D1):D607-d613.
72. Kumar S, Stecher G, & Tamura K (2016) MEGA7: Molecular Evolutionary Genetics Analysis Version 7.0 for Bigger Datasets. *Mol Biol Evol* 33(7):1870-1874.
73. Murrell B, *et al.* (2012) Detecting Individual Sites Subject to Episodic Diversifying Selection. *PLOS Genetics* 8(7):e1002764.
74. Murrell B, *et al.* (2013) FUBAR: a fast, unconstrained bayesian approximation for inferring selection. *Mol Biol Evol* 30(5):1196-1205.
75. Pond SLK & Frost SDW (2005) Datamonkey: rapid detection of selective pressure on individual sites of codon alignments. *Bioinformatics* 21(10):2531-2533.
76. Weaver S, *et al.* (2018) Datamonkey 2.0: A Modern Web Application for Characterizing Selective and Other Evolutionary Processes. *Molecular Biology and Evolution* 35(3):773-777.
77. Li R, *et al.* (2010) De novo assembly of human genomes with massively parallel short read sequencing. *Genome research* 20(2):265-272.
78. Liu W, *et al.* (2018) RGAAT: A Reference-based Genome Assembly and Annotation Tool for New Genomes and Upgrade of Known Genomes. *Genomics, Proteomics & Bioinformatics* 16(5):373-381.
79. Figueiró HV, *et al.* (2017) Genome-wide signatures of complex introgression and adaptive evolution in the big cats. *Science Advances* 3(7):e1700299.
80. Li C, *et al.* (2014) Two Antarctic penguin genomes reveal insights into their evolutionary history and molecular changes related to the Antarctic environment. *GigaScience* 3(1):27-27.
81. Ksepka D.T. BS, Giannini N. (2006) The phylogeny of the living and fossil Sphenisciformes (penguins). *Cladistics* 22:412-441.
82. Clarke JA, *et al.* (2007) Paleogene equatorial penguins challenge the proposed relationship between biogeography, diversity, and Cenozoic climate change. *Proc Natl Acad Sci U S A* 104(28):11545-11550.
83. Baker AJ, Pereira SL, Haddrath OP, & Edge KA (2006) Multiple gene evidence for expansion of extant penguins out of Antarctica due to global cooling. *Proc Biol Sci* 273(1582):11-17.
84. Subramanian S, Beans-Picon G, Swaminathan SK, Millar CD, & Lambert DM (2013) Evidence for a recent origin of penguins. *Biol Lett* 9(6):20130748.
85. Gavryushkina A, *et al.* (2017) Bayesian Total-Evidence Dating Reveals the Recent Crown Radiation of Penguins. *Systematic Biology* 66(1):57-73.
86. Weisrock DW, Harmon LJ, & Larson A (2005) Resolving deep phylogenetic relationships in salamanders: analyses of mitochondrial and nuclear genomic data. *Syst Biol* 54(5):758-777.
87. Oliveros CH, *et al.* (2019) Earth history and the passerine superradiation. *Proceedings of the National Academy of Sciences* 116(16):7916-7925.

88. Labuschagne C, Kotzé A, Grobler JP, & Dalton DL (2014) The complete sequence of the mitochondrial genome of the African Penguin (*Spheniscus demersus*). *Gene* 534(1):113-118.
89. Watanabe M, *et al.* (2006) New candidate species most closely related to penguins. *Gene* 378:65-73.
90. Grosser S, Burridge CP, Peucker AJ, & Waters JM (2015) Coalescent Modelling Suggests Recent Secondary-Contact of Cryptic Penguin Species. *PLOS ONE* 10(12):e0144966.
91. Simeone A, *et al.* (2009) *Heterospecific Pairing and Hybridization between Wild Humboldt and Magellanic Penguins in Southern Chile* (BIOONE) pp 544-550, 547.
92. Livermore R, Nankivell A, Eagles G, & Morris P (2005) Paleogene opening of Drake Passage. *Earth and Planetary Science Letters* 236:459-470.
93. Lyle M, Gibbs S, Moore TC, & Rea DK (2007) Late Oligocene initiation of the Antarctic Circumpolar Current: Evidence from the South Pacific. *Geology* 35(8):691-694.
94. Barker PF & Thomas E (2004) Origin, signature and palaeoclimatic influence of the Antarctic Circumpolar Current. *Earth-Science Reviews* 66(1):143-162.
95. Goldner A, Herold N, & Huber M (2014) Antarctic glaciation caused ocean circulation changes at the Eocene-Oligocene transition. *Nature* 511(7511):574-577.
96. Hansen J, Sato M, Russell G, & Kharecha P (2013) Climate sensitivity, sea level and atmospheric carbon dioxide. *Philosophical Transactions of the Royal Society A: Mathematical, Physical and Engineering Sciences* 371(2001):20120294.
97. Shevenell AE, Kennett JP, & Lea DW (2004) Middle Miocene Southern Ocean Cooling and Antarctic Cryosphere Expansion. *Science* 305(5691):1766-1770.
98. Dalziel IWD, *et al.* (2013) A potential barrier to deep Antarctic circumpolar flow until the late Miocene? *Geology* 41(9).
99. Pearce JA, *et al.* (2014) Composition and evolution of the Ancestral South Sandwich Arc: Implications for the flow of deep ocean water and mantle through the Drake Passage Gateway. *Global and Planetary Change* 123:298-322.
100. González-Wevar CA, *et al.* (2017) Following the Antarctic Circumpolar Current: patterns and processes in the biogeography of the limpet *Nacella* (Mollusca: Patellogastropoda) across the Southern Ocean. *Journal of Biogeography* 44(4):861-874.
101. Near TJ, *et al.* (2012) Ancient climate change, antifreeze, and the evolutionary diversification of Antarctic fishes. *Proceedings of the National Academy of Sciences* 109(9):3434-3439.
102. Strugnell JM, *et al.* (2011) The Southern Ocean: Source and sink? *Deep Sea Research Part II: Topical Studies in Oceanography* 58(1):196-204.
103. Strugnell JM, Rogers AD, Prodöhl PA, Collins MA, & Allcock AL (2008) The thermohaline expressway: the Southern Ocean as a centre of origin for deep-sea octopuses. *Cladistics* 24(6):853-860.
104. Crame JA (2018) Key stages in the evolution of the Antarctic marine fauna. *Journal of Biogeography* 45(5):986-994.

105. Halanych KM & Mahon AR (2018) Challenging Dogma Concerning Biogeographic Patterns of Antarctica and the Southern Ocean. *Annual Review of Ecology, Evolution, and Systematics* 49:355-378.
106. Dueñas LF, *et al.* (2016) The Antarctic Circumpolar Current as a diversification trigger for deep-sea octocorals. *BMC evolutionary biology* 16:2-2.
107. Zachos JC, Shackleton NJ, Revenaugh JS, Pälike H, & Flower BP (2001) Climate response to orbital forcing across the Oligocene-Miocene boundary. *Science* 292(5515):274-278.
108. Zhou P, *et al.* (2020) A pneumonia outbreak associated with a new coronavirus of probable bat origin. *Nature* 579(7798):270-273.
109. Damas J, *et al.* (2020) Broad Host Range of SARS-CoV-2 Predicted by Comparative and Structural Analysis of ACE2 in Vertebrates. *bioRxiv:2020.2004.2016.045302*.
110. Nery MF, Arroyo JI, & Opazo JC (2013) Accelerated Evolutionary Rate of the Myoglobin Gene in Long-Diving Whales. *Journal of Molecular Evolution* 76(6):380-387.
111. Mirceta S, *et al.* (2013) Evolution of mammalian diving capacity traced by myoglobin net surface charge. *Science* 340(6138):1234-1237.
112. Noren S, Williams T, Pabst DA, McLellan WA, & Dearolf J (2001) The development of diving in marine endotherms: Preparing the skeletal muscles of dolphins, penguins, and seals for activity during submergence. *Journal of comparative physiology. B, Biochemical, systemic, and environmental physiology* 171:127-134.
113. Duchamp C, *et al.* (1991) Nonshivering thermogenesis in king penguin chicks. I. Role of skeletal muscle. *Am J Physiol* 261(6 Pt 2):R1438-1445.
114. Duchamp C, Rouanet JL, & Barré H (2002) Ontogeny of thermoregulatory mechanisms in king penguin chicks (*Aptenodytes patagonicus*). *Comp Biochem Physiol A Mol Integr Physiol* 131(4):765-773.
115. Ponganis PJ, Welch TJ, Welch LS, & Stockard TK (2010) Myoglobin production in emperor penguins. *J Exp Biol* 213(11):1901-1906.
116. Hodgson DA, *et al.* (2014) Terrestrial and submarine evidence for the extent and timing of the Last Glacial Maximum and the onset of deglaciation on the maritime-Antarctic and sub-Antarctic islands. *Quaternary Science Reviews* 100:137-158.
117. Younger JL, *et al.* (2015) Too much of a good thing: sea ice extent may have forced emperor penguins into refugia during the last glacial maximum. *Glob Chang Biol* 21(6):2215-2226.
118. Peña M F, *et al.* (2014) Have Historical Climate Changes Affected Gentoo Penguin (*Pygoscelis papua*) Populations in Antarctica? *PLOS ONE* 9(4):e95375.
119. Clucas GV, *et al.* (2014) A reversal of fortunes: climate change ‘winners’ and ‘losers’ in Antarctic Peninsula penguins. *Scientific Reports* 4(1):5024.
120. Mura-Jornet I, *et al.* (2018) Chinstrap penguin population genetic structure: one or more populations along the Southern Ocean? *BMC Evol Biol* 18(1):90.
121. Dantas GPM, *et al.* (2018) Demographic history of the Magellanic Penguin (*Spheniscus magellanicus*) on the Pacific and Atlantic coasts of South America. *Journal of Ornithology* 159(3):643-655.

122. Cristofari R, *et al.* (2018) Climate-driven range shifts of the king penguin in a fragmented ecosystem. *Nature Climate Change* 8(3):245-251.
123. Trucchi E, *et al.* (2014) King penguin demography since the last glaciation inferred from genome-wide data. *Proceedings of the Royal Society B: Biological Sciences* 281(1787):20140528.
124. Cole TL, *et al.* (2019) Receding ice drove parallel expansions in Southern Ocean penguins. *Proceedings of the National Academy of Sciences* 116(52):26690-26696.
